# Supplementary material for: Importance of iron as the metal ion in peptide deformylase: a biomimetic computational study
Source: Springer Nature journal article supplement (doi:10.1007/s00214-010-0827-2), 2010-09-24
Supplement: MOESM1 [file 214_2010_827_MOESM1_ESM.doc]

**Supporting Information for**

Importance of iron as the metal ion in peptide deformylase:

a biomimetic computational study.

Matthew F. Brown, Benjamin F. Gherman*[[1]](#footnote-2)**

*Department of Chemistry,*

*California State University, Sacramento,*

*6000 J Street*

*Sacramento, CA 95819-6057*

*Received July 00, 2010*

**Table S1**. Relative electronic energies (kcal/mol) for the different possible spin states of the iron complexes.

|  | monodentate FeL(formate) complex | bidentate FeL(formate) complex | FeL(OH) | [FeL(H2O)]+ |
| --- | --- | --- | --- | --- |
| singlet | 0.00 | 0.00 | 0.00 | 0.00 |
| triplet | -15.45 | -15.48 | -16.59 | -8.71 |
| quintet | -38.24 | -39.22 | -42.89 | -39.32 |

|  | [FeL(formate)]+ | [FeL(OH)]+ |
| --- | --- | --- |
| doublet | 0.00 | 0.00 |
| quartet | -12.11 | -15.55 |
| sextet | -23.51 | -41.22 |

**Table S2**. Relative electronic energies (kcal/mol) for the different possible spin states of the cobalt complexes.

|  | monodentate CoL(formate) complex | bidentate CoL(formate) complex | CoL(OH) | [CoL(H2O)]+ |
| --- | --- | --- | --- | --- |
| doublet | 0.00 | 0.00 | 0.00 | 0.00 |
| quartet | -32.33a | -15.30 | -27.33 | -15.60 |

a The quartet monodentate CoL(formate) complex was not stable under optimization, and consistently optimized to the bidentate formate coordination mode.

|  | [CoL(formate)]+ | [CoL(OH)]+ |
| --- | --- | --- |
| singlet | 0.00 | 0.00 |
| triplet | 1.91 | -16.45 |
| quintet | 0.15 | -24.34 |

**Table S3**. NPA (natural population analysis) partial atomic charges along the deformylation reaction coordinate for M = Fe, Zn.

|  | M=Fe | | M=Zn | |
| --- | --- | --- | --- | --- |
| Fe | S | Zn | S |
| ML(OH) | 1.307 | -0.509 | 1.452 | -0.525 |
| transition state | 1.274 | -0.452 | 1.470 | -0.538 |
| tetrahedral intermediate | 1.271 | -0.444 | 1.470 | -0.522 |
| ML(formate) | 1.261 | -0.414 | 1.473 | -0.532 |

**Atomic Coordinates for Computed Structures.**

1. ZnL(acetate) – BLYP

h 1.83827431619837 2.93931936164009 -1.95791687515084

h -0.72267546969321 3.39413334232094 -1.95015361802478

h -3.78689078993284 1.20381044780433 -1.99435570138281

h 3.97216694895363 -0.16043508419167 -1.99391732267670

h 3.42084611689216 -2.87076224044975 -1.63325915158415

h -4.18670376449970 -1.53522775184053 -1.64267350991546

c -1.66037766955429 3.24764083476081 -1.38676499761154

c 2.66855081855382 2.48586842490464 -1.38937637847975

c 3.08401715647407 -0.10596087246587 -1.36997836724051

c -2.93280715898789 0.95167809734295 -1.37141864094279

h 3.56281103867268 2.52909427057375 -2.02625323475623

h -2.48390466984155 3.59215981346408 -2.02731680408401

h -1.62712775773363 3.90470054639843 -0.50223789668773

h 2.85609593240548 3.11836317849430 -0.50622471579165

o -0.63766622203726 -3.62703221213685 -0.78904496236007

c -1.88970068423138 1.80671730283415 -1.02026207408448

c 2.39468741332457 1.05354858611850 -1.01955732446517

c -3.43688060107356 -1.58862307477012 -0.84012358523482

c 2.69473211940881 -2.66527538562645 -0.83345720734680

c -2.65472891300897 -0.30424020230922 -0.77110339003431

c 2.39641327379557 -1.19129981917286 -0.76637184327348

h -1.97689654372135 -5.82974128187487 0.20556654517280

h -0.24598530315323 -6.17204419121363 0.06456398553731

h 3.12399789784928 -3.02822760375611 0.11550163157139

h -3.96771939004687 -1.78270463609490 0.10707142283125

n -1.03988207070370 1.06628811546146 -0.21928400476173

n 1.34463216673641 0.64764413442321 -0.21668708006205

h -2.76066955713671 -2.43579347635561 -1.03276978959842

h 1.77119086235319 -3.23163858425431 -1.02919835078031

h 0.43738344823268 2.47997533799970 -0.02569627497424

n -1.50279654458534 -0.22714933302364 -0.07339262533033

n 1.34013377191708 -0.72590164945697 -0.06839441584609

c -0.71533828234416 -4.08120273644797 0.37423255931669

c -0.98712068062173 -5.57253247649473 0.61531736847571

c 0.25911901788000 1.46817540634750 0.36189349465020

h -0.95598356331443 -5.82864566689235 1.68188071799501

zn -0.25880880279636 -1.47390208516946 1.17382479952476

o -0.58562154747130 -3.35975289733318 1.47106025187867

h -0.66506680725262 3.60031149641727 1.86870110484528

h 1.86015662725331 3.14950632073941 1.87097549057897

c 0.28028005112073 1.59856495776259 1.93971783389010

h 2.47979870097011 1.47638307883860 2.07833792644856

h -1.82634811351489 2.24490327156100 2.07064313810279

c -0.82614262170777 2.61098461375530 2.33987675146483

c 1.66721205444497 2.16650982546988 2.34342956365749

s -0.00578891230571 0.00232774857082 2.91180572624308

h 1.69456723645392 2.30750770497094 3.43308261350108

h -0.80743452862046 2.75197704235645 3.42970721679521

1. ZnL(acetate) – B3LYP

h 1.82232231540190 2.90607269783597 -1.94309268802405

h -0.71887383663796 3.35397988025782 -1.94185191657709

h -3.76695956696083 1.19060416752036 -1.96224143564686

h 3.94902441868077 -0.16691817441639 -1.96190237108084

h 3.40697403829256 -2.85713483781508 -1.58828634435716

h -4.17547135973148 -1.52339216458247 -1.58909657532150

c -1.64516243574913 3.21628064403731 -1.37186170979529

c 2.64590220343350 2.46120228735887 -1.37240218247925

c 3.06262095557794 -0.11103425929465 -1.34759340181854

c -2.91453825754033 0.94047328958450 -1.34821341570031

h 3.53817884709599 2.50430821377851 -1.99977138628846

h -2.46886747865124 3.56153068084369 -1.99950369065875

h -1.60002616561567 3.86730555852872 -0.49249016971656

h 2.82518308535319 3.08940546153824 -0.49356970444665

o -0.62943209982982 -3.57988028382824 -0.79565896043612

c -1.87526545732023 1.78508175316548 -1.00384748658860

c 2.37400219196325 1.03758315150949 -1.00338667973577

c -3.41156869366693 -1.58225572187697 -0.81026338645253

c 2.66928164761550 -2.65177117205541 -0.80905512048566

c -2.63330734410770 -0.30573457005728 -0.74910648534017

c 2.37328165951440 -1.18634562589923 -0.74794730980839

h -1.94082133271224 -5.77966258481991 0.13321132831060

h -0.21368406342708 -6.10451690624549 0.06002439641168

h 3.07451231494804 -3.01037668991820 0.14361129799864

h -3.91444528247658 -1.78124728248066 0.14258373748052

n -1.03126627465169 1.05134516503675 -0.21614527124111

n 1.33062955949079 0.63607373192490 -0.21510487406209

h -2.74229422635963 -2.42066961049208 -1.02501051947229

h 1.75414020250816 -3.21156677911934 -1.02336935828889

h 0.43343194978768 2.45759342588951 -0.03255977961820

n -1.49048913148166 -0.22411758741014 -0.06703810785826

n 1.32709692093201 -0.71955145330486 -0.06566792437062

c -0.70952873678720 -4.03598080040407 0.35315181977278

c -0.97667394668423 -5.51751411849027 0.57954615995099

c 0.25658576847004 1.45308753000183 0.35492841278258

h -0.98233513453230 -5.77174735875471 1.63968793268013

zn -0.25555704274159 -1.45603630321022 1.16208398952305

o -0.58317127629455 -3.32451694688928 1.43644244998883

h -0.65889775547019 3.57422452809635 1.83389582010047

h 1.84125939816374 3.13299503660672 1.83529534259349

c 0.27940156363561 1.58779496954264 1.91759609776888

h 2.46363850111330 1.47311512908747 2.04909403235312

h -1.81246092043777 2.22774650043052 2.04506707204650

c -0.81850581215453 2.59478272330632 2.30929112633992

c 1.65496408508947 2.15853372536768 2.31119877001281

s 0.00127198198809 0.01482668577551 2.88481875036247

h 1.68510338817833 2.30425293138393 3.39317276460312

h -0.79920336521153 2.74177136295588 3.39133695458954

1. ZnL(acetate) – OLYP

h 1.83827017476298 2.90461877233604 -2.03696477139938

h -0.73719897049404 3.39578152971176 -2.00680006576225

h -3.78543344021779 1.25871464791425 -1.99380318066045

h 4.01018941766312 -0.11335025509368 -1.93432902789525

h 3.61255314553736 -2.79111839174469 -1.46343357547924

h -4.27547652737398 -1.42226034754140 -1.60716706721670

c -1.64712334139019 3.25672963572076 -1.40733344127599

c 2.64431641423936 2.48954772956045 -1.41680695969951

c 3.10969528456459 -0.07333163429907 -1.33385444340686

c -2.93091834615903 0.98881875650468 -1.38547252477560

h 3.56221671655230 2.52879971451931 -2.01145107169725

h -2.48922547856084 3.60521949374603 -2.01323545711552

h -1.57816356955671 3.91370505972587 -0.53118120882355

h 2.78328739984403 3.15324962981686 -0.55395791045317

o -0.61842302420380 -3.71192111521602 -0.82494412845182

c -1.87641083662484 1.82326519785320 -1.03821492024043

c 2.38571461426397 1.06905614941269 -1.01816546510075

c -3.47341681524710 -1.52772740966952 -0.86926214336211

c 2.79067489178834 -2.61575278256870 -0.76163036935609

c -2.66270383097169 -0.26908132136830 -0.80260955553308

c 2.43890518477200 -1.15935171046057 -0.73033312243861

h -1.93057286164931 -5.69164275224145 1.21973492847005

h -1.07275195282970 -6.17405846443094 -0.27692799227938

h 3.11127533290174 -2.96549764851208 0.22904793749844

h -3.93542937599504 -1.75124736123206 0.10203194212187

n -1.03550340292354 1.06167267534337 -0.26084125375493

n 1.33542103727446 0.64454821571366 -0.23857445981534

h -2.84498180645546 -2.38103326265216 -1.14611699734749

h 1.92765359740317 -3.21748652223245 -1.06646973048538

h 0.43110393045699 2.45917136233282 -0.01908882098751

n -1.50497419899475 -0.20998282961592 -0.12494755579102

n 1.36020819748719 -0.70725852930528 -0.07044289632867

c -0.72287770182589 -4.12347329334321 0.34252568769228

c -0.99872910158376 -5.59583660908184 0.64815172617084

c 0.24881026270674 1.44526467294456 0.34258076942440

h -0.19786848528095 -6.00478104934202 1.27716360419315

zn -0.27202310662857 -1.49239751825579 1.13272365140711

o -0.61447327235785 -3.37673738421676 1.41683239726331

h -0.65671167961165 3.56415651398634 1.88409845928796

h 1.85068778540916 3.07969913218251 1.90082096119400

c 0.25450853085957 1.55199666797587 1.92102905642342

h 2.44311537173028 1.40355448264567 2.09428505820336

h -1.83592914325994 2.22851256287928 2.04404758797276

c -0.83598529739168 2.57099660664624 2.32601619708325

c 1.63667373229922 2.09677163222487 2.35017833140275

s -0.06156876814923 -0.02546942489485 2.86082642004890

h 1.64515108931504 2.22083912508975 3.43772949353388

h -0.82555777609436 2.68610765053200 3.41453590754145

1. ZnL(acetate) – O3LYP

h 1.81401933686790 2.87266648398339 -1.97055727472150

h -0.72698654004761 3.31684234404306 -1.97531132620711

h -3.74900947917601 1.21941983839510 -1.91845187288259

h 3.94426142184923 -0.13004734844595 -1.91732785746533

h 3.51066274904754 -2.77677867360391 -1.47863784592033

h -4.24303370249160 -1.41645247535522 -1.47898080401673

c -1.62347280027498 3.19083118387656 -1.38143775343497

c 2.61638412527942 2.44705792288408 -1.38127509842017

c 3.05753629944662 -0.08565736926866 -1.32358089023572

c -2.90016412640747 0.95932138383102 -1.32465233458642

h 3.51042681707242 2.48524878095141 -1.98374571760786

h -2.45368768940274 3.53290401036922 -1.97933619485652

h -1.55023013645840 3.84373461877969 -0.52214737321287

h 2.77517052627691 3.08480089306027 -0.52210495195378

o -0.62988801628810 -3.60410542948585 -0.79458714142625

c -1.85300660518555 1.78140912730506 -1.00256394752048

c 2.35231994734995 1.04372572579590 -1.00225566793464

c -3.42837079909359 -1.51825253346944 -0.77846021798939

c 2.71113366116559 -2.59498953068880 -0.77687909901649

c -2.63034245657646 -0.27497167974864 -0.73557141183176

c 2.38376256438100 -1.15436175208654 -0.73430400290997

h -1.93523176084919 -5.75847265371073 0.16445787312080

h -0.23155993952333 -6.08765772047302 0.08343066315247

h 3.03220684808946 -2.94811447306438 0.19486476007497

h -3.84903227157529 -1.74216861175470 0.19362853755085

n -1.01843208198780 1.03990187307068 -0.23819942981648

n 1.31529118166199 0.63067186199852 -0.23770735287717

h -2.81158455590872 -2.35467867168702 -1.07368155252578

h 1.84612092998569 -3.17186179159428 -1.07032894179572

h 0.42684120592193 2.42311358254480 -0.03110616347333

n -1.48381966473119 -0.20648987738932 -0.08285377716345

n 1.32891031597017 -0.69963291492731 -0.08180186037501

c -0.71035477393232 -4.03622274574141 0.34995781609792

c -0.97835164342232 -5.49704344000196 0.59553600004937

c 0.25185373234144 1.42551967219086 0.33558720951494

h -0.97844660001878 -5.73872446099856 1.64590390603022

Zn -0.25422167327535 -1.45882697157884 1.12053918870975

o -0.58465289972442 -3.31750625205197 1.41120895799511

h -0.65785423549688 3.51018102612542 1.83014708383352

h 1.81794136988208 3.07467234549955 1.83113820710702

c 0.27222080949849 1.54367186949433 1.88600380490080

h 2.43187740953220 1.43284514802106 2.02577143953783

h -1.79578344033051 2.17662134079050 2.02308349846149

c -0.81254234517603 2.53575068845663 2.28403285847238

c 1.62999605297993 2.10623501477099 2.28526669447728

s -0.00063779003857 -0.00664166009770 2.82574797654548

h 1.65327149593984 2.23646090017343 3.35637016687255

h -0.79151077314670 2.66605140081278 3.35517121967296

1. ZnL(acetate) – B97-1

h 1.85558520584286 2.91604210150519 -1.91037152115679

h -0.69194399821305 3.33909449798413 -1.96995471177177

h -3.76611365029814 1.18971443682422 -1.99048709047173

h 3.99342932263736 -0.16858370590683 -1.90483756534039

h 3.44283008707562 -2.86575424257667 -1.53725123322135

h -4.21028781348934 -1.51495480775444 -1.56947390142838

c -1.62580485385183 3.21144744701650 -1.40673043222249

c 2.67368271812010 2.46550421123193 -1.33297545278288

c 3.09273422345193 -0.11377888325468 -1.30906430414745

c -2.91543944409416 0.93878068564501 -1.37196993974252

h 3.57489899580994 2.50985771858365 -1.95011199634867

h -2.44405257421694 3.55686234209163 -2.04405509101868

h -1.58537007343687 3.86641029734768 -0.52779542107675

h 2.84408435282049 3.08525181935752 -0.44421535822462

o -0.62396792798899 -3.53684997574089 -0.80291822667861

c -1.86765986249923 1.78048567469597 -1.03173452243450

c 2.39380622350236 1.03659982872018 -0.97711146296939

c -3.42653480295110 -1.58251920795804 -0.80933600548780

c 2.68224644254221 -2.66032099130615 -0.77826458577166

c -2.64075265301884 -0.30634595972633 -0.76010957939236

c 2.38661501285304 -1.19120608393215 -0.72519607453205

h -1.89047096735457 -5.64268619715899 1.13125841248655

h -1.06405178018564 -6.02273823716663 -0.41270393710781

h 3.05912724693842 -3.01803114370777 0.18797107605865

h -3.90445722095852 -1.78440303718045 0.15724685294387

n -1.02964064890211 1.04628698714074 -0.23806956631052

n 1.33240007698591 0.63241065205872 -0.21461369372264

h -2.76354346931389 -2.42231127593763 -1.04600343494229

h 1.77040219146662 -3.21827536382412 -1.01884821939673

h 0.43244012884686 2.45667176949735 -0.04484676787326

n -1.49669607720158 -0.22646063728730 -0.07662482931945

n 1.32358216935192 -0.72464278505071 -0.06583161838641

c -0.71322151774949 -4.02178969680419 0.33368434897598

c -0.97373857541569 -5.50894009883596 0.54647894237938

c 0.25245456137264 1.44946817077433 0.34236592088509

h -0.15525001312091 -5.94594203207042 1.12927523231442

Zn -0.26614035360928 -1.46349806510583 1.15450377322290

o -0.59687773568746 -3.33577116759844 1.43467530259880

h -0.70363352864982 3.56278615637841 1.80670060201667

h 1.80891740522216 3.14878467945885 1.83524382671318

c 0.25990971791360 1.58522669099077 1.90742315269299

h 2.44664070579018 1.48965966980588 2.05092613723729

h -1.84334140606966 2.19814236371207 2.01506672925670

c -0.85564164378173 2.58233384148713 2.28691608852500

c 1.63032427531476 2.17045369873042 2.31056274114513

s -0.00755688200053 0.01072907586049 2.87577517044106

h 1.65135134907744 2.31398502104997 3.39493397998703

h -0.84527293887716 2.73281375793588 3.37049825339917

1. ZnL(acetate) – HCTH

h 1.81151691706199 2.89353354833995 -2.01199679434113

h -0.72055981606310 3.33769082533813 -2.01648175450933

h -3.78393535767166 1.23604109913236 -1.94415618309468

h 3.98076929466548 -0.12745710722404 -1.94228485951425

h 3.59544362728806 -2.79282497629383 -1.43660046008273

h -4.32735687541321 -1.40294967829980 -1.44349726965973

c -1.62792490443332 3.21653770431499 -1.41330474356001

c 2.62669397649666 2.46917972752159 -1.41439205266579

c 3.08569338213707 -0.08395337690294 -1.33775772894519

c -2.92765530737381 0.97162680934053 -1.33968387793607

h 3.52874097816461 2.50834970456049 -2.02794855842316

h -2.46604015655687 3.56270742469394 -2.02109392178141

h -1.54926200333928 3.88755505384633 -0.55150358524235

h 2.78766912833951 3.12622691355347 -0.55321312652144

o -0.63858083931176 -3.63682342604609 -0.80800623364319

c -1.86734463653474 1.79979729604418 -1.01972046067644

c 2.36992870105793 1.05580059297182 -1.01961724624771

c -3.47336543499588 -1.52210517499861 -0.77326046854506

c 2.75165633305731 -2.61366901136157 -0.76679001293486

c -2.66445972947857 -0.27059516251940 -0.73661934670291

c 2.41618596875540 -1.16175402990545 -0.73266593083471

h -1.95397277117761 -5.82320084011705 0.14204188149688

h -0.23094342592964 -6.15262647175335 0.05535419850023

h 3.02735334731452 -2.97845861444525 0.22884050840651

h -3.85735816475109 -1.77298920618509 0.22172111398606

n -1.03101290884565 1.04915062386341 -0.23951201999812

n 1.32796876485726 0.63519124809270 -0.23923927931096

h -2.86685272868809 -2.36507417075497 -1.11550475862682

h 1.89483180702529 -3.20091479087668 -1.10829031672636

h 0.42983708982603 2.44521065960204 -0.02539213583194

n -1.50635944251298 -0.20323573309616 -0.07488607898302

n 1.34966650388771 -0.70384583165650 -0.07205129118930

c -0.71782919666071 -4.08157846874845 0.34421801077801

c -0.98608864019488 -5.55985963822739 0.58014319623794

c 0.25266277075780 1.43583523967692 0.34347142257710

h -0.98567970194792 -5.81859670387662 1.63966583644295

Zn -0.26002699433086 -1.48330135162056 1.16574033634526

o -0.59200940004521 -3.37008735424029 1.43057692845759

h -0.65877814112996 3.54964812708076 1.85555865136568

h 1.84149276385759 3.10153626467486 1.85485338401707

c 0.27422742869534 1.55802097477731 1.91310597999062

h 2.45867713767216 1.44038356780822 2.05767175706719

h -1.81559663145461 2.20632927553356 2.05288546353093

c -0.81802208048233 2.56370019543878 2.31509802935285

c 1.64696465360699 2.12286122079317 2.31634193143192

s -0.00528943006425 -0.00315454403478 2.86990598789646

h 1.67005680715790 2.25869820671480 3.39962613157315

h -0.79573266229465 2.69744335947060 3.39864974707417

1. ZnL(Cl) – BLYP

h -1.21187557279076 -3.33782429816715 -2.51614630614621

h -3.08889090674665 -1.39610305468434 -2.83236734685316

h -3.94072524693103 1.47712687306405 -2.75100156661316

c -2.50108065330783 -0.94858859487727 -2.03526595006556

c -0.68763899271634 -2.81620748555932 -1.70364719877779

h -0.69083198953038 -3.48042972880567 -0.82378865121347

h 4.18966660830830 -0.81989156460597 -0.92081179277459

h 2.23108817776125 4.37063090315205 -1.06476385459272

c -1.37521608971181 -1.50564213838413 -1.43340411847891

h 0.36082344863205 -2.68261794914019 -2.02094087529335

c -3.80320563243399 1.32295228867451 -1.66924330707539

c -2.72003856786692 0.30950469103036 -1.41140356586700

h -4.76762698781860 0.97809549830454 -1.25967799087908

h 3.91594145871582 1.88503400841718 -0.83877383704123

h -3.55628936564406 2.28618718542085 -1.20141729307232

c 3.16933581227580 -1.01788231936155 -0.56474734335219

c 2.92601815482777 1.59447075921862 -0.49701488456832

c 1.80642878743668 3.96223545603295 -0.13418421711034

h 2.66663421618864 -1.63194516544144 -1.33179112727393

c 2.46570297356597 0.29069952382762 -0.32839552886302

n -0.96225274353755 -0.59680477919007 -0.47563723109206

c 1.85298254334022 2.45739924922496 -0.14445509883113

n -1.77898457506252 0.51686509796083 -0.46764444344597

h 3.24722695480478 -1.62354196025430 0.35289722678774

h 0.77282391247142 4.32007111453644 -0.02826727482142

h 2.39862484676350 4.36644302550237 0.70402419090900

n 1.16249380941310 0.39891678272742 0.12334179323684

h 0.71581567512511 -1.60548729738665 0.14064488765816

n 0.78446358818443 1.72310792341805 0.22695774366683

c 0.20099072727613 -0.68015467991147 0.43114799828697

cl -2.07289776117166 4.02857440418670 0.60331138415819

Zn -1.23145944785946 2.01777698338036 1.01828388784738

h -0.57853953581303 -3.00675590384212 1.70797080393308

h -2.02751937735349 -1.95339002722732 1.58233579269915

c -0.15489446527555 -0.84917176203508 1.96655497910344

c -1.06982901391700 -2.09549471869576 2.10117752162821

h 1.69320699214645 -2.00389940655404 2.35434407466608

h 1.85244744683320 -0.23988453285432 2.65461457898439

c 1.17360501480827 -1.10049047160182 2.72865516905309

s -1.02977875217333 0.61085905753997 2.80055531428147

h -1.29083202765471 -2.26672930833870 3.16402881301296

h 0.95408655643786 -1.25801367870116 3.79394464418935

1. ZnL(Cl) – B3LYP

h -1.20502713322097 -3.32002187586149 -2.49044447246827

h -3.06783885310503 -1.38957538897625 -2.81476881564204

h -3.86270911241957 1.49464302005764 -2.76442767201340

c -2.47946492945338 -0.94213023390308 -2.02736193246435

c -0.69621803370240 -2.80775638234081 -1.67175031278264

h -0.73073246102021 -3.46330666430897 -0.79517857424309

h 4.16857480636785 -0.81166757157891 -0.86107481665168

h 1.44317995632520 4.29344121556913 -1.10402251680588

c -1.36781555408236 -1.49519842480596 -1.42079090462807

h 0.35392338018150 -2.68741905359755 -1.96183877159639

c -3.74720847483987 1.33327290576728 -1.68836547130039

c -2.68223966903367 0.31694863416676 -1.41951192678629

h -4.71350866564504 0.99266421386188 -1.30023373815586

h 3.90135124031029 1.87662085365377 -0.76055915687045

h -3.50325298407258 2.28559482867945 -1.21275789429917

c 3.14690035676019 -1.00960355503763 -0.53158950321907

c 2.91095048253430 1.58433505908280 -0.44433431307548

c 1.78106683259518 3.93197569012868 -0.12664807324022

h 2.66072618632176 -1.60799569318457 -1.31093647079229

c 2.44531398594921 0.29059487675754 -0.29895875475094

n -0.95102119101773 -0.58778720352250 -0.48473305046008

c 1.83780568666383 2.43641391083299 -0.10444492378530

n -1.74762864986659 0.51873847269434 -0.49041232634287

h 3.20170916122067 -1.61866358878674 0.37667386223884

h 1.07845084966958 4.31039594670203 0.61827580360453

h 2.77082570679434 4.35435088167313 0.06462709055825

n 1.14893054036828 0.39676017072729 0.12464076682931

h 0.71059895541243 -1.59421864008119 0.13271806309964

n 0.77810690887629 1.70343838098864 0.23910405427103

c 0.19655686907665 -0.67552753023513 0.41951361214713

cl -2.04251914759721 4.00278491407797 0.61119469989794

Zn -1.22095955350976 1.99670856768101 0.98904359477328

h -0.53776125038127 -2.99731125338765 1.67933084357138

h -1.99727963533482 -1.97912892074778 1.53317709425909

c -0.16517520414818 -0.84675650354443 1.93810403187922

c -1.04973020072169 -2.10180254912624 2.06189000037657

h 1.68862798780634 -1.96075921315140 2.32862521427353

h 1.80967086832228 -0.20653907444977 2.64024524487970

c 1.15210118424268 -1.07612666737386 2.70278036255683

s -1.06470453913219 0.57735760040074 2.75143495103444

h -1.28114608765562 -2.27413868839263 3.11518928253766

h 0.92856938416119 -1.24360546710854 3.75857581958593

1. ZnL(Cl) – OLYP

h -1.21828767595353 -3.32304643718672 -2.50580160562404

h -3.05701331754902 -1.40032663179921 -2.83126550608845

h -3.97416366368408 1.38808998807685 -2.75306544611472

c -2.47733669733036 -0.95082056937142 -2.03409960754910

c -0.67091987703148 -2.80076962601911 -1.71495273718578

h -0.64233028323640 -3.46477151961644 -0.84174094789228

h 4.15984299825627 -0.80729736185120 -0.95119515789707

h 2.31345431722655 4.34171312483976 -1.01255880597386

c -1.35557278279955 -1.49960917899249 -1.42879368511795

h 0.35954846145428 -2.66382061239771 -2.06984025515710

c -3.79598305145789 1.28968937376317 -1.67537732762275

c -2.70390395796931 0.29813324413911 -1.41195691908877

h -4.73807643699665 0.96031820623152 -1.21495540561356

h 3.89502819638849 1.85826499807989 -0.85679011391614

h -3.54686109217647 2.27312409906936 -1.26753246670313

c 3.14241680850143 -1.01806454712499 -0.60765809469696

c 2.90953378674269 1.57504694774382 -0.50728978818938

c 1.83242553749069 3.93598483081755 -0.11418956265926

h 2.65118028567532 -1.60934676896609 -1.39238609050475

c 2.44095851221188 0.27889189853997 -0.34426153202661

n -0.96067176416960 -0.59104976735228 -0.47359064282850

c 1.85247480388442 2.43792353944411 -0.13813082927928

n -1.77100981013239 0.50422280001722 -0.46889327673350

h 3.22155669479921 -1.64585551727824 0.28894883433801

h 0.80971691290388 4.31863724029270 -0.05839360375865

h 2.38562509423290 4.31744485383385 0.75553548701748

n 1.15156720961199 0.40041267150389 0.12075025209233

h 0.70126364673851 -1.58886902384392 0.16056885036249

n 0.78942341347875 1.70867538403758 0.23656770532345

c 0.18966467224001 -0.66486848411311 0.43718824740998

Cl -2.09041979147893 4.03300929361563 0.68301968118945

Zn -1.23967770550357 2.02279963028504 1.03378501930787

h -0.56658779139975 -2.98660234079677 1.74000097519550

h -2.01946399325453 -1.95381872960568 1.59474951708463

c -0.16711298438743 -0.82663419543662 1.97001483274893

c -1.06456409026480 -2.07764399967033 2.11366496427703

h 1.68454565671959 -1.95893559251718 2.37717886628335

h 1.82280456471244 -0.19956261389112 2.66951117870218

c 1.15442425530550 -1.06281288604233 2.73715085398688

s -1.04715672727222 0.60327080530018 2.78530954152182

h -1.28680713223380 -2.23428028093340 3.17403800772722

h 0.92646479770694 -1.21684624482498 3.79673659365316

1. ZnL(Cl) – O3LYP

h -1.19155410178232 -3.27609762032102 -2.46803265712460

h -3.01043072558801 -1.37531174818628 -2.79823978754112

h -3.84055528357107 1.43857521046755 -2.73963902347316

c -2.43736702708405 -0.93237026935320 -2.01306612620961

c -0.66818318480993 -2.76657469192101 -1.67420693317435

h -0.67133828984909 -3.41866659823694 -0.81113738119412

h 4.11249126011757 -0.79736469939882 -0.87932094114113

h 1.47196082407827 4.24567005876885 -1.09046877596575

c -1.33622225923234 -1.47589023531108 -1.40849717991066

h 0.35817747460512 -2.64108544917054 -1.99506418100007

c -3.71440805064079 1.29620305569010 -1.67531499420740

c -2.65082089055003 0.30616177461309 -1.40582750304295

h -4.66244481038373 0.95421276311973 -1.27893366371171

h 3.85401386105655 1.84039971775636 -0.77453226260094

h -3.48513433423209 2.24767326546011 -1.22254045241824

c 3.10464468967975 -1.00219565783736 -0.55376176157649

c 2.87594728818560 1.55700120900677 -0.45193521519976

c 1.78375700212575 3.88120578749960 -0.11962809917437

h 2.62822001543746 -1.58526119581642 -1.33182229983691

c 2.40959789727926 0.27779605355929 -0.30643532547393

n -0.94157483137639 -0.57872555110871 -0.47435952832178

c 1.82370951645536 2.40363950811769 -0.10221464767898

n -1.73110951842682 0.50331710841132 -0.47882717520878

h 3.16795705279180 -1.61709676254483 0.33378108855065

h 1.08390973009738 4.26462775955749 0.60562260263653

h 2.76316583409906 4.28720223502713 0.08643892474390

n 1.13287567235940 0.39357318910279 0.12762814700909

h 0.69339543609777 -1.56907625900384 0.15088847534580

n 0.77572176167990 1.67881277495455 0.24570585447892

c 0.18705248753474 -0.65888344630457 0.42559179377254

Cl -2.04474239723498 3.97563526311645 0.66601615332794

Zn -1.21709291203028 1.98378688940336 0.99388885493692

h -0.54757295942054 -2.95437716236393 1.68633113753283

h -1.98622047300373 -1.94530134199768 1.53693377316512

c -0.17299828410075 -0.82519502474140 1.92967130851598

c -1.04844622678842 -2.06484091041816 2.05657392071880

h 1.65696800168143 -1.93121623501929 2.32992786436308

h 1.77933372162516 -0.19749726527738 2.63037764065865

c 1.12668882908740 -1.05443233280029 2.68947140352435

s -1.05416788613194 0.57351294123796 2.72783523666743

h -1.27673581790997 -2.22743618092949 3.09875710667861

h 0.89953190807253 -1.21410992680804 3.73236462855978

1. ZnL(Cl) – B97-1

h -1.21193233093194 -3.33063670393684 -2.47428251514622

h -3.08369600161116 -1.39606372468213 -2.79871651161583

h -3.89451960943410 1.48486978623978 -2.73445101022567

c -2.49152201839178 -0.94732849282381 -2.01301146832647

c -0.69084038952531 -2.80850622145306 -1.66758776962187

h -0.70561479726541 -3.45723702269294 -0.78312751958262

h 4.15688328532687 -0.82093335908865 -0.91027802101668

h 2.20674255585395 4.34411781115945 -1.04752915757401

c -1.36997027939139 -1.49669088946614 -1.41340226185538

h 0.35436988415257 -2.67948640906018 -1.97809729573288

c -3.76648233565924 1.32869025333406 -1.65761427400314

c -2.69478860059224 0.31214076789110 -1.39869582002305

h -4.72772114289608 0.98707189571670 -1.25414657997597

h 3.89253765397780 1.87624242080598 -0.82278905473518

h -3.51483432872477 2.28426874704923 -1.18776044921764

c 3.14122931853171 -1.01616552136732 -0.55641017156062

c 2.90662368311935 1.58518773662145 -0.48717992718101

c 1.78131932780746 3.93777883521895 -0.12325670500970

h 2.63667346291805 -1.62435005995085 -1.31887689138211

c 2.44315255220892 0.28978496308116 -0.32431071717705

n -0.95153044990493 -0.58839745969342 -0.47872070146182

c 1.83292528087535 2.43909836129744 -0.13615735704788

n -1.75395388496810 0.51597218063900 -0.47380448906956

h 3.21408574818947 -1.61249139406357 0.36125762215507

h 0.74968200584173 4.28827786053393 -0.02273495563647

h 2.36519633942688 4.33663168263604 0.71548455729387

n 1.15209061591015 0.39757976929895 0.11738106616338

h 0.71503328322031 -1.59617724559588 0.12998150575757

n 0.77754457460250 1.70576905841561 0.22502240723189

c 0.20167903098843 -0.67386162588833 0.41761608450657

Cl -2.04758938085646 3.99630038385169 0.59296974010176

Zn -1.21611712475329 1.99820519673345 0.99680103274305

h -0.55130727694670 -2.99043583888152 1.67649507739209

h -2.00310151287469 -1.95134461295987 1.54494635931899

c -0.15265224396759 -0.84167031641355 1.94028734601183

c -1.05183807891064 -2.08972079246831 2.06749883551829

h 1.69677614197961 -1.97431372360521 2.31655233009192

h 1.83595513091621 -0.21550214718778 2.62239679383143

c 1.17202554369827 -1.08218292410817 2.69520795616639

s -1.03069123464742 0.59116209569016 2.76361020761034

h -1.27645987272174 -2.26139358288098 3.12432958846476

h 0.95463747542938 -1.24425973794565 3.75510311381976

1. ZnL(Cl) – HCTH

h -1.21782893716413 -3.32543121080615 -2.47071947127179

h -3.05419787885991 -1.41179753647579 -2.81160889485163

h -3.94612826678757 1.38404671993194 -2.76031127899201

c -2.47355686830857 -0.95661213946381 -2.02140709270962

c -0.67906002949890 -2.79873327499578 -1.68084862803224

h -0.66189277445741 -3.45366968949093 -0.80342782998522

h 4.12130754222483 -0.81076838925561 -0.98010441064913

h 2.30784788118552 4.33434031353386 -0.97255407752357

c -1.35697775820419 -1.49909042251363 -1.41444583325268

h 0.35415560452026 -2.67163263986407 -2.02442356208017

c -3.77337931940208 1.28484480185915 -1.68463052389349

c -2.69241742406635 0.29466880469746 -1.41551243516735

h -4.71753280706374 0.96140971998261 -1.23124334193735

h 3.88138221693422 1.84922640913484 -0.84820403802419

h -3.52441647678777 2.26607996869832 -1.27711577804024

c 3.10894560017625 -1.01390532444001 -0.62592534234619

c 2.89722280144170 1.56844786751202 -0.49985737211187

c 1.83633361635636 3.91847719554299 -0.07719660430572

h 2.60595469862244 -1.59907929853315 -1.40457695249488

c 2.42254734221846 0.27939295442784 -0.35060120268107

n -0.95954921174268 -0.58351657439440 -0.47735530614134

c 1.85029634611846 2.42876163469796 -0.11965569113911

n -1.75905586839510 0.50398845204310 -0.48383624073823

h 3.19447705220430 -1.64508441223322 0.26484947114715

h 0.81821601453271 4.30471235540126 -0.00592678618582

h 2.39898025028626 4.28699653775220 0.78834364126588

n 1.14147057886563 0.40484658696888 0.11585911413473

h 0.69629741000526 -1.57687652878713 0.15435656927853

n 0.79174228630614 1.70204663181882 0.24652997282159

c 0.18514331598607 -0.65498395416989 0.42864164057691

Cl -2.07820735984418 4.02400750908700 0.64892202506820

Zn -1.24257259084169 2.01958456825655 1.02805054159423

h -0.52766157509367 -2.97710248387451 1.72717615916009

h -1.99390446874204 -1.97233306163979 1.57707875460085

c -0.16745766402481 -0.81942187089226 1.95477540669505

c -1.04015366366742 -2.07791853202740 2.09744366420951

h 1.69589940097376 -1.91869383042783 2.35128240011739

h 1.80522206641693 -0.16396116419286 2.65193906814018

c 1.15162337377858 -1.03588038114988 2.71561001989353

s -1.06569826386449 0.58736544187650 2.76391423985617

h -1.26328146557062 -2.23792631393780 3.15434998437871

h 0.92986527323308 -1.19882543965735 3.77236602161629

1. FeL(formate) – monodentate singlet

C -3.017489 0.605027 -1.241800

C -1.952004 1.428471 -0.993788

C 2.312290 0.571442 -0.941102

C -3.565126 -1.837492 -0.605535

C 2.416026 -3.084445 -0.902397

C -2.726042 -0.622031 -0.645894

C 2.155055 -1.635353 -0.785858

C -0.289963 -4.201854 0.683428

H -0.308132 -5.293453 0.708523

C 0.182330 1.058714 0.304549

C 0.164969 1.116271 1.849972

C -0.984190 2.005895 2.299670

C 1.478243 1.721322 2.324526

C -1.720816 2.827899 -1.404175

C 2.699194 1.967028 -1.229489

C 2.938733 -0.594797 -1.282364

H 1.963141 2.482908 -1.834499

H 3.625314 1.966868 -1.782834

H -2.562892 3.169002 -1.985958

H -1.616754 3.495832 -0.558996

H 2.856161 2.547327 -0.329953

H -0.837661 2.932751 -2.022578

H 2.515679 -3.538729 0.072207

H -4.350322 -1.770485 -1.343368

H -4.034130 -1.949460 0.365023

H 1.610596 -3.584750 -1.419706

H -3.898024 0.856460 -1.791535

H 0.394772 2.051350 -0.058397

H -0.890784 3.017879 1.916088

H 3.852196 -0.688727 -1.827521

H 1.606590 2.739078 1.967163

H 2.324528 1.126846 2.016941

H -1.940996 1.605483 2.004144

H 1.484372 1.750115 3.403728

H -0.979137 2.065075 3.377676

H 3.329835 -3.246549 -1.453143

H -2.979479 -2.723799 -0.791731

N -1.083204 0.692294 -0.266675

N 1.204975 0.209779 -0.254589

N -1.535650 -0.550686 -0.061110

N 1.096466 -1.130143 -0.164724

O -0.869919 -3.591529 -0.246291

O 0.313080 -3.575217 1.586111

S 0.003029 -0.557237 2.548632

Fe -0.384858 -1.834376 0.797630

1. FeL(formate) – bidentate singlet

C -3.017024 0.525123 -1.277532

C -1.952496 1.363193 -1.080110

C 2.314923 0.518299 -0.969173

C -3.561123 -1.875949 -0.496485

C 2.425663 -3.128281 -0.708331

C -2.723163 -0.664325 -0.610473

C 2.161804 -1.675275 -0.679918

C -0.286286 -4.154096 0.926602

C 0.180953 1.075487 0.240409

C 0.159153 1.224762 1.779577

C -0.993974 2.136072 2.172089

C 1.469259 1.861190 2.220487

C -1.722965 2.735709 -1.573813

C 2.698321 1.894315 -1.343362

C 2.944615 -0.665254 -1.237153

H 3.629547 1.863181 -1.887281

H 2.844331 2.532538 -0.482053

H -1.622154 3.453874 -0.770401

H -0.838463 2.804592 -2.195336

H 1.965424 2.365965 -1.987157

H -2.564238 3.039372 -2.177180

H 2.516930 -3.524210 0.292186

H -4.042438 -1.921710 0.473285

H -2.972351 -2.771869 -0.614981

H 1.625796 -3.659867 -1.202660

H -3.898473 0.742230 -1.840325

H 0.392220 2.045154 -0.180731

H -0.307243 -5.242309 1.015050

H -0.902522 3.123648 1.728927

H 3.859651 -0.790252 -1.773418

H 1.595115 2.856341 1.803458

H 2.318335 1.252421 1.950890

H -1.948715 1.715564 1.898498

H 1.472446 1.954315 3.296089

H -0.992210 2.259515 3.244684

H 3.344710 -3.320889 -1.240286

H -4.337147 -1.861576 -1.247108

N -1.082093 0.672648 -0.311023

N 1.206750 0.196776 -0.264285

N -1.532519 -0.556616 -0.031957

N 1.100855 -1.135282 -0.093035

O -0.858969 -3.597827 -0.040799

O 0.312208 -3.477302 1.795436

S -0.000718 -0.404777 2.576317

Fe -0.381726 -1.784617 0.902383

1. FeL(formate) – monodentate triplet

C -2.997302 0.568326 -1.283033

C -1.906109 1.363392 -1.058338

C 2.352706 0.667637 -0.934543

C -3.641917 -1.815650 -0.522635

C 2.497190 -2.989467 -1.048510

C -2.764973 -0.629543 -0.609416

C 2.235941 -1.541724 -0.891951

C -0.459009 -4.285225 0.847100

H -0.425068 -5.375981 0.838071

C 0.184145 1.025708 0.299330

C 0.158942 1.071057 1.848294

C -0.975861 1.988900 2.280289

C 1.480115 1.647023 2.336768

C -1.623000 2.731892 -1.535277

C 2.713893 2.084416 -1.148366

C 3.013020 -0.466521 -1.326219

H 1.961387 2.623140 -1.711520

H 3.630833 2.131728 -1.715003

H -2.444717 3.068125 -2.148261

H -1.512850 3.440099 -0.723785

H 2.876557 2.615888 -0.220453

H -0.727462 2.777694 -2.142537

H 2.715231 -3.446706 -0.092203

H -4.573971 -1.624177 -1.032138

H -3.865178 -2.057741 0.508368

H 1.638745 -3.496604 -1.464565

H -3.858830 0.822399 -1.860924

H 0.355221 2.035948 -0.035124

H -0.861632 2.991843 1.879039

H 3.936210 -0.508087 -1.862414

H 1.632043 2.660077 1.977714

H 2.316652 1.034774 2.037721

H -1.938694 1.602487 1.985253

H 1.475520 1.681120 3.415876

H -0.975270 2.065798 3.357114

H 3.342072 -3.152379 -1.700322

H -3.175870 -2.684653 -0.963218

N -1.076633 0.639556 -0.272095

N 1.242489 0.239424 -0.287918

N -1.585224 -0.570832 -0.004126

N 1.161593 -1.094478 -0.267239

O -0.983582 -3.667938 -0.113259

O 0.033425 -3.660334 1.815098

S -0.043141 -0.577844 2.603235

Fe -0.537638 -1.932570 0.946122

1. FeL(formate) – bidentate triplet

C -2.994984 0.487980 -1.323757

C -1.908374 1.298728 -1.136306

C 2.347396 0.612441 -0.971984

C -3.638270 -1.850483 -0.431629

C 2.499953 -3.044185 -0.863233

C -2.760675 -0.671678 -0.587053

C 2.235601 -1.590235 -0.793507

C -0.439155 -4.226677 1.108027

C 0.180512 1.041250 0.240375

C 0.156192 1.178815 1.783823

C -0.977370 2.122155 2.160572

C 1.478403 1.780458 2.237050

C -1.626843 2.639392 -1.687488

C 2.703931 2.014414 -1.273584

C 3.009635 -0.542053 -1.294481

H 3.626232 2.030231 -1.833220

H 2.854696 2.606052 -0.380741

H -1.495009 3.386748 -0.915511

H -0.743962 2.647873 -2.314900

H 1.954135 2.510789 -1.877882

H -2.459249 2.950602 -2.299248

H 2.657343 -3.454036 0.125565

H -4.022356 -1.914992 0.579211

H -3.107600 -2.767407 -0.637856

H 1.666369 -3.571033 -1.305339

H -3.853827 0.706675 -1.919850

H 0.351747 2.029737 -0.153565

H -0.397803 -5.315494 1.168435

H -0.863466 3.098590 1.698626

H 3.932809 -0.614582 -1.827317

H 1.630770 2.771441 1.821063

H 2.314149 1.151639 1.972007

H -1.940715 1.718651 1.891222

H 1.475481 1.875285 3.312525

H -0.974890 2.264835 3.230654

H 3.381852 -3.239075 -1.454253

H -4.480470 -1.776163 -1.102713

N -1.080878 0.622476 -0.306758

N 1.238332 0.222034 -0.299927

N -1.584921 -0.575049 0.021610

N 1.160475 -1.108346 -0.196987

O -0.952562 -3.674898 0.102954

O 0.034924 -3.537826 2.040905

S -0.048824 -0.422163 2.633880

Fe -0.538734 -1.872914 1.060584

1. FeL(formate) – monodentate quintet

C -2.977995 0.578072 -1.275004

C -1.925258 1.397831 -0.966742

C 2.269760 0.650521 -0.978977

C -3.524224 -1.886731 -0.690429

C 2.671554 -2.977029 -0.666439

C -2.714645 -0.649939 -0.669396

C 2.325830 -1.539709 -0.656261

C -0.779934 -4.511944 0.329898

H -0.955995 -5.574551 0.536628

C 0.179657 1.039720 0.372452

C 0.200567 1.147150 1.924848

C -0.865219 2.156305 2.329375

C 1.569937 1.672858 2.332245

C -1.690477 2.803414 -1.355945

C 2.518851 2.048242 -1.387194

C 2.983555 -0.479001 -1.278044

H 1.715515 2.450563 -1.991463

H 3.416621 2.084403 -1.984301

H -2.525522 3.148275 -1.945510

H -1.602610 3.461039 -0.501462

H 2.664448 2.708038 -0.542187

H -0.800442 2.920705 -1.961342

H 3.542271 -3.148143 -1.280570

H -4.400968 -1.750270 -1.304629

H -3.850829 -2.152790 0.306694

H 2.890442 -3.330621 0.332903

H -3.828834 0.836348 -1.866794

H 0.357828 2.039176 0.012688

H -0.689222 3.129090 1.880277

H 3.867910 -0.529168 -1.874919

H 1.784359 2.634504 1.875954

H 2.355606 0.979480 2.076114

H -1.854903 1.819374 2.063036

H 1.591774 1.805758 3.402996

H -0.843850 2.281099 3.401104

H 1.852753 -3.567386 -1.052272

H -2.951414 -2.716001 -1.080425

N -1.090801 0.657917 -0.199167

N 1.239191 0.243308 -0.200915

N -1.563735 -0.582983 -0.022160

N 1.268179 -1.082147 -0.008012

O -0.719551 -4.106945 -0.819520

O -0.653307 -3.799491 1.390337

S -0.112372 -0.405459 2.849878

Fe -0.344504 -1.902884 1.142652

1. FeL(formate) – bidentate quintet

C -3.021011 0.579154 -1.344042

C -1.926407 1.362203 -1.099017

C 2.280034 0.606061 -1.041231

C -3.702688 -1.795987 -0.591985

C 2.654128 -3.024319 -0.771657

C -2.803295 -0.625595 -0.673510

C 2.314268 -1.586347 -0.738805

C -0.455830 -4.426974 1.247037

C 0.160258 1.006010 0.255792

C 0.174159 1.153042 1.805227

C -0.942106 2.116471 2.185085

C 1.514094 1.761921 2.196792

C -1.632675 2.730118 -1.574005

C 2.559413 2.006193 -1.421566

C 2.997075 -0.523579 -1.329298

H 3.462020 2.035000 -2.011750

H 2.711991 2.645393 -0.562483

H -1.500477 3.433086 -0.762178

H -0.747957 2.767882 -2.196988

H 1.769029 2.437363 -2.022619

H -2.460160 3.079307 -2.171697

H 2.269799 -3.534586 0.097283

H -4.429432 -1.658674 0.199970

H -3.155960 -2.700500 -0.383091

H 2.238296 -3.498755 -1.652778

H -3.870121 0.845527 -1.935052

H 0.343059 1.996902 -0.124850

H -0.640130 -5.504160 1.260221

H -0.827495 3.080224 1.697974

H 3.902116 -0.571562 -1.894657

H 1.669702 2.728673 1.727411

H 2.336489 1.110117 1.946053

H -1.914030 1.714989 1.945082

H 1.534782 1.909222 3.265645

H -0.914394 2.282493 3.251074

H 3.725917 -3.154853 -0.808287

H -4.249188 -1.915955 -1.516490

N -1.111521 0.624329 -0.308374

N 1.220700 0.198087 -0.303825

N -1.635699 -0.582965 -0.053026

N 1.236802 -1.130692 -0.120647

O -1.339830 -3.692822 0.714883

O 0.584955 -3.969749 1.735848

S -0.038330 -0.386671 2.775607

Fe -0.340351 -1.925019 1.106928

1. FeL(OH) – singlet

C -3.079021 0.246403 -1.124455

C -2.029844 1.107221 -0.952083

C 2.307750 0.347607 -0.924677

C -3.524106 -2.189496 -0.367764

C 2.525185 -3.280547 -0.454459

C -2.734803 -0.947111 -0.487551

C 2.223065 -1.837480 -0.539884

H -0.673673 -3.978082 -0.608479

C 0.156159 0.869640 0.291920

C 0.185906 1.020638 1.833630

C -0.928462 1.968964 2.250176

C 1.524420 1.619784 2.237727

C -1.850612 2.490510 -1.435375

C 2.645515 1.719101 -1.354138

C 2.985698 -0.823569 -1.122236

H 1.897416 2.138338 -2.016523

H 3.578912 1.699130 -1.894949

H -2.712891 2.775180 -2.018039

H -1.754036 3.202810 -0.625985

H 2.766750 2.396689 -0.519202

H -0.981358 2.593135 -2.073992

H 3.315370 -3.461688 0.264520

H -4.287288 -2.086899 0.394769

H -2.885308 -3.018038 -0.101560

H 1.651530 -3.833300 -0.145551

H -3.982551 0.449360 -1.656867

H 0.327887 1.843151 -0.138657

H -0.812161 2.954040 1.806425

H 3.916325 -0.936856 -1.634248

H 1.674598 2.606184 1.807403

H 2.348729 0.982346 1.958439

H -1.901398 1.580001 1.994298

H 1.551360 1.724736 3.311900

H -0.903043 2.089089 3.322765

H 2.864778 -3.657506 -1.409751

H -4.025248 -2.412140 -1.299743

N -1.114074 0.431461 -0.219191

N 1.191542 0.017898 -0.233009

N -1.528482 -0.816080 0.052586

N 1.128295 -1.305688 -0.009120

O -0.673091 -3.687917 0.296683

S -0.031595 -0.598399 2.638285

Fe -0.354147 -2.002618 0.905963

1. FeL(OH) – triplet

C -3.044068 0.264840 -1.202827

C -1.976575 1.092286 -0.983647

C 2.257302 0.359771 -0.958088

C -3.610684 -2.133134 -0.398174

C 2.629529 -3.251511 -0.475628

C -2.773766 -0.920203 -0.515087

C 2.278891 -1.817803 -0.555674

H -0.694401 -3.826116 -0.531706

C 0.147138 0.814951 0.341104

C 0.178584 0.977102 1.882797

C -0.931468 1.937058 2.284368

C 1.522249 1.574622 2.273244

C -1.735303 2.462531 -1.480410

C 2.525555 1.740002 -1.411874

C 2.966654 -0.785556 -1.197386

H 1.739166 2.124421 -2.049792

H 3.438317 1.750094 -1.987125

H -2.575766 2.771604 -2.082277

H -1.628400 3.181689 -0.678546

H 2.653061 2.430297 -0.588371

H -0.852358 2.525725 -2.104353

H 3.454298 -3.406535 0.209534

H -4.397778 -1.987530 0.332077

H -3.013632 -2.976376 -0.086671

H 1.786977 -3.828802 -0.127708

H -3.909980 0.490704 -1.786548

H 0.317865 1.796066 -0.070744

H -0.813134 2.910131 1.816594

H 3.868482 -0.863743 -1.764986

H 1.678082 2.548808 1.819123

H 2.341462 0.925912 2.004495

H -1.906064 1.545585 2.038074

H 1.552366 1.704930 3.344485

H -0.902047 2.082468 3.353672

H 2.938227 -3.625932 -1.442328

H -4.084070 -2.364083 -1.342555

N -1.127052 0.398701 -0.188033

N 1.200203 -0.010911 -0.196206

N -1.602305 -0.821947 0.090640

N 1.205719 -1.328926 0.042699

O -0.685036 -3.731961 0.414257

S -0.046641 -0.603983 2.771741

Fe -0.369599 -2.125247 1.187839

1. FeL(OH) – quintet

C -3.018859 0.352108 -1.325426

C -1.961256 1.165304 -1.015012

C 2.265243 0.422853 -0.983731

C -3.563171 -2.117802 -0.747270

C 2.605897 -3.218207 -0.770982

C -2.752087 -0.881759 -0.731774

C 2.283254 -1.775850 -0.734000

H -0.799843 -4.358028 2.113242

C 0.143119 0.801755 0.325384

C 0.152924 0.903098 1.878257

C -0.949120 1.877860 2.274923

C 1.499171 1.491071 2.283274

C -1.724941 2.572744 -1.396892

C 2.543767 1.829079 -1.340831

C 2.975256 -0.704925 -1.299906

H 1.751352 2.268326 -1.933560

H 3.445978 1.870095 -1.930932

H -2.550262 2.917008 -2.000392

H -1.653848 3.226371 -0.537844

H 2.694168 2.453202 -0.470264

H -0.823786 2.694285 -1.984549

H 3.537412 -3.415546 -0.256086

H -4.467169 -1.990551 -0.164901

H -3.013350 -2.948993 -0.332311

H 1.830956 -3.802617 -0.298586

H -3.870954 0.620020 -1.911434

H 0.320750 1.800897 -0.036318

H -0.814127 2.856972 1.822578

H 3.876820 -0.743949 -1.871647

H 1.671838 2.466857 1.836633

H 2.313741 0.833032 2.023398

H -1.925621 1.499802 2.015305

H 1.515867 1.612732 3.355299

H -0.929305 2.005413 3.346220

H 2.720620 -3.561219 -1.790827

H -3.860361 -2.370545 -1.756087

N -1.124704 0.419551 -0.255784

N 1.207612 0.007119 -0.247970

N -1.599206 -0.820664 -0.088941

N 1.214796 -1.323465 -0.101748

O -0.688316 -4.033925 1.226645

S -0.091647 -0.659946 2.789411

Fe -0.388609 -2.239561 1.025435

1. [FeL(H2O)]+ – singlet

C -3.009024 0.536433 -1.424333

C -1.955686 1.355317 -1.108163

C 2.252988 0.387341 -0.962781

C -3.569928 -1.930049 -0.875797

C 2.176579 -3.273459 -0.976802

C -2.759172 -0.695222 -0.824859

C 1.997514 -1.811843 -0.839283

H 0.760118 -4.181566 1.409995

C 0.125086 0.941795 0.283305

C 0.063185 0.976228 1.827995

C -1.035704 1.933035 2.262101

C 1.402179 1.452071 2.368191

C -1.705270 2.759900 -1.485568

C 2.704219 1.765949 -1.235039

C 2.818341 -0.803986 -1.334514

H 0.584809 -3.204255 2.579076

H 1.982022 2.327219 -1.814072

H 3.617073 1.731851 -1.807934

H -2.535584 3.123404 -2.069675

H -1.605899 3.406219 -0.624194

H 2.908769 2.316044 -0.326707

H -0.814422 2.864719 -2.091990

H 2.728741 -3.683546 -0.139635

H -4.615218 -1.687148 -0.992600

H -3.467573 -2.514715 0.027569

H 1.233171 -3.793617 -1.061951

H -3.858564 0.800138 -2.015236

H 0.377014 1.935960 -0.047269

H -0.839946 2.941018 1.914556

H 3.713977 -0.929572 -1.902268

H 1.621754 2.460810 2.037344

H 2.211701 0.800500 2.078179

H -2.007601 1.621915 1.913291

H 1.369264 1.466694 3.446871

H -1.074748 1.966137 3.340222

H 2.746189 -3.494631 -1.866450

H -3.287678 -2.552363 -1.716308

N -1.128362 0.612576 -0.339183

N 1.143336 0.071039 -0.258759

N -1.604164 -0.628722 -0.170582

N 0.979392 -1.263021 -0.184491

O 0.175838 -3.522306 1.773545

S -0.283882 -0.692790 2.499470

Fe -0.534836 -1.891500 0.734731

1. [FeL(H2O)]+ – triplet

C -2.976276 0.495704 -1.391623

C -1.910048 1.294411 -1.074350

C 2.305629 0.534996 -1.078507

C -3.558011 -1.966865 -0.871402

C 2.682441 -3.104089 -0.896239

C -2.727393 -0.746526 -0.813470

C 2.342154 -1.667899 -0.836125

H -1.256502 -4.499559 1.590893

C 0.190235 0.888069 0.262532

C 0.205174 0.909099 1.815770

C -0.964716 1.746603 2.307822

C 1.515567 1.531982 2.273995

C -1.660069 2.704079 -1.435727

C 2.571212 1.943981 -1.430184

C 3.015743 -0.589346 -1.404751

H -0.993079 -3.611159 2.821766

H 1.779657 2.372020 -2.031173

H 3.477822 1.996719 -2.011333

H -2.477986 3.063003 -2.039604

H -1.592820 3.345876 -0.567528

H 2.708901 2.567024 -0.556938

H -0.755500 2.824388 -2.016988

H 3.729367 -3.255887 -0.675781

H -4.589480 -1.737295 -0.644751

H -3.217919 -2.708043 -0.164277

H 2.107379 -3.677799 -0.184745

H -3.828871 0.780292 -1.968384

H 0.368461 1.904849 -0.043969

H -0.903084 2.763815 1.938790

H 3.914828 -0.623804 -1.979923

H 1.604829 2.555763 1.929200

H 2.371531 0.968192 1.937802

H -1.914556 1.324772 2.020558

H 1.546302 1.551745 3.352647

H -0.941689 1.794475 3.385810

H 2.498490 -3.505275 -1.884698

H -3.535358 -2.405000 -1.861023

N -1.078436 0.530197 -0.327183

N 1.255061 0.113965 -0.333938

N -1.569915 -0.710783 -0.168689

N 1.272073 -1.222167 -0.195015

O -0.818928 -3.707660 1.888992

S 0.086927 -0.768556 2.553722

Fe -0.279150 -1.998308 0.808016

1. [FeL(H2O)]+ – quintet

C -3.028646 0.455197 -1.309777

C -1.936592 1.246776 -1.069518

C 2.297958 0.493374 -1.003478

C -3.669882 -1.940989 -0.591976

C 2.739369 -3.115867 -0.584514

C -2.801065 -0.747292 -0.647178

C 2.361681 -1.688187 -0.627996

H -0.907827 -4.502243 0.221722

C 0.163916 0.901238 0.283212

C 0.175155 1.045964 1.837743

C -0.932839 2.013427 2.225194

C 1.524335 1.619979 2.243948

C -1.662279 2.620070 -1.537541

C 2.560105 1.882064 -1.431336

C 3.035539 -0.636337 -1.241636

H -0.841117 -4.505685 1.760573

H 1.774271 2.270129 -2.066073

H 3.474628 1.907475 -2.002250

H -2.500084 2.967433 -2.120940

H -1.526557 3.316109 -0.720937

H 2.682563 2.555546 -0.594084

H -0.787035 2.667226 -2.172325

H 3.733579 -3.232732 -0.175080

H -4.682010 -1.660987 -0.335574

H -3.324598 -2.647953 0.146683

H 2.059500 -3.688517 0.027026

H -3.884082 0.719725 -1.892160

H 0.344218 1.895931 -0.088151

H -0.797426 2.977166 1.747473

H 3.949125 -0.688984 -1.792586

H 1.698357 2.582372 1.776223

H 2.338769 0.956330 1.998589

H -1.910668 1.632098 1.975954

H 1.540358 1.771449 3.312203

H -0.908855 2.174340 3.291899

H 2.749040 -3.544598 -1.578125

H -3.708924 -2.438686 -1.552760

N -1.106323 0.515558 -0.290095

N 1.230561 0.097625 -0.271247

N -1.626626 -0.699225 -0.035021

N 1.263714 -1.227965 -0.045847

O -0.739645 -3.958414 0.986332

S -0.073582 -0.497659 2.829383

Fe -0.340077 -1.862284 1.114048

1. [FeL(OH)]+ – doublet

c -2.97557659044671 0.23854289502687 -1.32388088566854

c -1.98023974203556 1.12759982225547 -1.01390672686655

c 2.29971839734221 0.45268573349063 -1.01629245845803

c -3.36336521833840 -2.26524733604967 -0.80033574234908

c 2.48249950843739 -3.20923600795295 -0.84641221200373

c -2.63416926357551 -0.98395081763981 -0.74987961923534

c 2.22476780642619 -1.75683760880942 -0.78112570121416

h -1.15047340221121 -3.49309678309027 2.46563477015755

c 0.17015764724767 0.86603690212266 0.31186322124288

c 0.17721768639673 0.87603684144975 1.85985958935272

c -0.93306966189672 1.79427839851597 2.34914057067208

c 1.52480652243391 1.38331511078131 2.34904920321920

c -1.83896228351608 2.54938452751094 -1.38263024349667

c 2.62715518401104 1.84856257920054 -1.36439519615075

c 2.95306011168359 -0.70865959980102 -1.33899158286225

h 1.85228093136970 2.31095938614328 -1.96242392650879

h 3.53449667543267 1.86454878191509 -1.94660547451636

h -2.69503172664941 2.84940950520302 -1.96552578612158

h -1.79189480408111 3.19529106826691 -0.51642436653509

h 2.79094719055957 2.46160735458483 -0.48859794083857

h -0.95906436032414 2.72693029733080 -1.98767954056189

h 3.50570005272932 -3.42333057226203 -0.57201202290185

h -4.41237655922865 -2.10206519206378 -0.59869101802906

h -2.98152470793882 -2.97127412369886 -0.08029389931711

h 1.83642030980483 -3.76488366518130 -0.18363103313972

h -3.85197726052130 0.44672636634619 -1.89773607692768

h 0.32396877434964 1.88210281133681 -0.01129936090908

h -0.77576831644243 2.81032915714306 2.00607516533196

h 3.85048482712409 -0.78932780438715 -1.91236447403383

h 1.70471288058673 2.39611377655282 2.00814805530870

h 2.33924216869959 0.75164640947072 2.03143725202367

h -1.90859731239604 1.46067385345932 2.03191490973310

h 1.53143695327105 1.40327591823118 3.42832390883559

h -0.93442035811500 1.81566455926204 3.42818029206189

h 2.33257692902466 -3.57898075740903 -1.85246803380165

h -3.28988961209984 -2.70416095354576 -1.78737080301437

n -1.08591649029813 0.44513564293184 -0.26269680492613

n 1.23079329155544 0.08516174897505 -0.27308263206181

n -1.47755532487050 -0.83198357119129 -0.11441208656104

n 1.18178160048828 -1.24711743279779 -0.13801997671105

o -1.00891219967530 -3.41795774817796 1.52312868396313

s -0.10715647785020 -0.79740014907622 2.56627963192614

fe -0.31828377646315 -1.99650932437280 0.81015037189316

1. [FeL(OH)]+ – quartet

c -3.02798253624849 0.36034490699532 -1.31508434469654

c -1.97105065274067 1.17863396851603 -1.01766847778749

c 2.25231936963087 0.42826798261546 -1.01510172964543

c -3.58745485000934 -2.09483657340171 -0.72773694410227

c 2.65644993446148 -3.19880879253063 -0.67823747124890

c -2.76894540836738 -0.86611140931530 -0.70829963175972

c 2.30391703036300 -1.76501032234743 -0.68111509057165

h -1.07557613345770 -4.45161442718809 1.75089107551084

c 0.14270267212454 0.81930046074630 0.31335850332623

c 0.15811445961289 0.90817141724391 1.86743514873263

c -0.94016762218762 1.85905872076796 2.33095512588129

c 1.51850362797303 1.42090052102836 2.32897348738622

c -1.73117459427893 2.57737924204299 -1.42493363443389

c 2.50459946674148 1.82177857884044 -1.43318436010782

c 2.96966841356598 -0.70314435336679 -1.29336180563322

h 1.71267196267614 2.21056016851370 -2.06019078667565

h 3.41402512452469 1.85566309519045 -2.01168571628560

h -2.56475448146236 2.91880626287601 -2.01767478641122

h -1.64134049682373 3.24635148821949 -0.57963016474496

h 2.63271613459839 2.49224731403141 -0.59384902849430

h -0.84249364733425 2.67935256711130 -2.03399653648959

h 3.63231278731362 -3.34515782646178 -0.23463278925255

h -4.52982445613679 -1.93426095184707 -0.22075706227802

h -3.08230564148259 -2.91919524134550 -0.24818729748827

h 1.94149271325477 -3.78656735229045 -0.12388022678464

h -3.87889501207398 0.61907128378300 -1.90656380437780

h 0.31971110315687 1.82513264668103 -0.02840030488464

h -0.78303213489302 2.84001571326507 1.89990219361433

h 3.86450171756205 -0.75520338624169 -1.87429195026862

h 1.71013933849563 2.39474633447180 1.89566449606356

h 2.32438944457324 0.75808195482238 2.05431868408512

h -1.92615693724215 1.51712920223130 2.05629763593768

h 1.52632414816872 1.53478574351071 3.40195146819831

h -0.90793669323019 1.96647438079656 3.40414498565240

h 2.70404986673621 -3.57908291386090 -1.68981595742785

h -3.81353476806889 -2.38460811254783 -1.74461342661905

n -1.13348467777042 0.44492824667692 -0.24544808434300

n 1.20626167473621 0.02903057637959 -0.24877125153131

n -1.61261473823766 -0.79934707240973 -0.06276898837656

n 1.23341286367700 -1.30199448733550 -0.05285044335973

o -0.39066449503165 -3.94264603929320 1.33337453259833

s -0.11697739408854 -0.66576916142593 2.73600128750332

fe -0.40191648278029 -2.21285435414797 0.89946347158994

1. [FeL(OH)]+ – sextet

C -2.996591 0.321698 -1.341481

C -1.960301 1.161840 -1.025403

C 2.248746 0.418966 -1.007885

C -3.530906 -2.139068 -0.746291

C 2.590085 -3.220115 -0.724378

C -2.729910 -0.899457 -0.729900

C 2.264499 -1.780675 -0.707874

H -0.777702 -4.305265 1.913105

C 0.145358 0.830147 0.339012

C 0.153209 0.912161 1.893981

C -0.945868 1.868331 2.332346

C 1.509801 1.433302 2.343875

C -1.740554 2.565065 -1.427285

C 2.526509 1.812000 -1.409161

C 2.938336 -0.725454 -1.315087

H 1.730612 2.229625 -2.011743

H 3.424717 1.834638 -2.005084

H -2.577010 2.896715 -2.021195

H -1.662595 3.229461 -0.577455

H 2.684932 2.461165 -0.558689

H -0.850887 2.681241 -2.032396

H 3.514976 -3.403628 -0.193293

H -4.430000 -2.015126 -0.156228

H -2.979732 -2.977628 -0.350295

H 1.813075 -3.812342 -0.267210

H -3.842806 0.564784 -1.946020

H 0.324339 1.836649 0.000266

H -0.787536 2.853469 1.910103

H 3.822092 -0.787384 -1.911589

H 1.703795 2.411734 1.920888

H 2.314449 0.768136 2.071899

H -1.927413 1.520091 2.050907

H 1.519216 1.537613 3.417793

H -0.929518 1.970440 3.406386

H 2.728747 -3.563218 -1.740151

H -3.837916 -2.375498 -1.755088

N -1.122506 0.447866 -0.238406

N 1.210401 0.036178 -0.229165

N -1.584955 -0.804330 -0.064930

N 1.215651 -1.298180 -0.052489

O -0.673066 -3.780221 1.125126

S -0.133788 -0.681138 2.778500

Fe -0.361986 -2.034589 1.041986

1. [FeL(formate)]+ – doublet

c -2.96770118787615 0.49678748904424 -1.39821945287443

c -1.94822401246040 1.36692822975104 -1.11243235546308

c 2.32072616922116 0.62470626078783 -1.08091339443816

c -3.42990425929733 -1.97391954867257 -0.84716139752502

c 2.54919943524812 -3.02563691717822 -0.85193902210436

c -2.64621168863529 -0.72241698205353 -0.80997503516580

c 2.24793000182785 -1.58043494715213 -0.80564990935139

c -0.68261128002790 -3.86284949478528 1.75942785141187

c 0.18806334123064 1.06533451669705 0.20642584886457

c 0.17747040278116 1.06466576843805 1.75216009254722

c -0.94688751163709 1.95981895451125 2.25108854226485

c 1.51675894783845 1.57007446706490 2.26733854788027

c -1.77938844054746 2.78278623246059 -1.49307531909249

c 2.65838205710490 2.01588578221553 -1.43949300360821

c 2.97989799547282 -0.54129227482964 -1.37135350581689

h 3.57434777859658 2.02125355598343 -2.00831531329048

h 2.81314773052598 2.63896980283313 -0.56901836762280

h -1.71335001960060 3.43550914898645 -0.63306637583710

h -0.90019042650522 2.93779217021241 -2.10528447801910

h 1.89492504040582 2.47526163633888 -2.05424393624595

h -2.63293443968527 3.09662434096606 -2.07237122222853

h 2.62989477644766 -3.44411722876056 0.13961854398447

h -3.65055791352457 -2.33207033582993 0.14659521507386

h -2.90199470257256 -2.76026813978051 -1.37021134868351

h 1.78234777933481 -3.57648117420331 -1.38014858993899

h -3.84546094459912 0.71514999468023 -1.96584358954333

h 0.36613673050361 2.07945167915494 -0.11021840315463

h -0.85902088678271 -4.83898890376543 2.19932513092341

h -0.79779700554433 2.98148151355539 1.92284502089699

h 3.88719338519698 -0.63353017348932 -1.92687654230017

h 1.68963108700382 2.59046347750518 1.94693155615475

h 2.34010328449173 0.95345041850187 1.94254798587627

h -1.91695981833910 1.62199232011285 1.92207914898161

h 1.51589817444201 1.56986727728068 3.34694027017442

h -0.95382169789644 1.96861018458316 3.33058927261696

h 3.48145762578411 -3.18378361745437 -1.36999721981811

h -4.35883377141689 -1.80216811820071 -1.36691112466377

n -1.06177885828072 0.66409738287486 -0.37527221570071

n 1.23552432003703 0.26413452754320 -0.36277313478746

n -1.47186496421649 -0.59946952225771 -0.19218658315908

n 1.18004529959595 -1.06560802337138 -0.19763956578280

o -1.63471515025982 -3.08449934407468 1.48898410522111

o 0.48120884614050 -3.46589065125712 1.49025410059521

s -0.08954376229968 -0.61979732518767 2.42279733164650

fe -0.32053746722656 -1.84787440977905 0.73464184110194

1. [FeL(formate)]+ – quartet

c -2.98580960987648 0.50609453162390 -1.35970968937894

c -1.93335795008290 1.34650842150883 -1.10206819080911

c 2.29014457683174 0.60803563690284 -1.05764306385304

c -3.54773370835712 -1.91250672036070 -0.65116030898308

c 2.70149119209609 -3.00098533179222 -0.57351080993987

c -2.71998873280679 -0.69048008341687 -0.70382134230507

c 2.33613689132839 -1.57157954528204 -0.64122617206013

c -0.71684049611222 -4.16998136409276 1.10176162195378

c 0.17909572337127 1.05806370569234 0.24875041763907

c 0.18091844484831 1.15566557577741 1.79410444002767

c -0.92099041986506 2.10553838314853 2.24050677070953

c 1.53427775951117 1.66635800496078 2.26612070017350

c -1.70474461433709 2.72869110244302 -1.56691628283342

c 2.55015887887826 1.98269256453113 -1.52830725521333

c 3.00371046645348 -0.53938119497676 -1.29053882208525

h 3.47274765563520 1.99480045629911 -2.08623949337926

h 2.65581303997368 2.68577143913658 -0.71322125398334

h -1.60089174054128 3.42751923729201 -0.74789093384848

h -0.82716034228056 2.80804558852629 -2.19510840692884

h 1.77124173554455 2.34152501040224 -2.18843429779013

h -2.54983297368535 3.04584740773569 -2.15668607191882

h 2.88203236117271 -3.31057928394598 0.44754737522494

h -3.88057641479538 -2.11477038417830 0.35875311698748

h -3.00012561459306 -2.77447844125755 -1.00396424460404

h 1.91917257421533 -3.62550497166509 -0.98053101294916

h -3.84537959091000 0.73284808849684 -1.95146055972010

h 0.35708442800212 2.05518922612232 -0.11711150546998

h -0.88943761517794 -5.23654420541962 1.21106867722600

h -0.75022088119194 3.10131611477331 1.84969229399748

h 3.90260928366770 -0.61955262619613 -1.86147749377532

h 1.72934908844969 2.65635920942055 1.87206087654824

h 2.34161031199490 1.00944457943065 1.98345068091205

h -1.89975633634906 1.77052523444340 1.93531677304390

h 1.53775940731478 1.74411331941214 3.34285518358510

h -0.92242420669427 2.18049811640074 3.31744826622160

h 3.60355288011268 -3.17844892626198 -1.13678631121484

h -4.42370158154191 -1.79179806512428 -1.26811174613750

n -1.08886843093407 0.65455060298771 -0.30474913947661

n 1.24398605764591 0.24605504731706 -0.28140553957329

n -1.55663224459107 -0.58369187755083 -0.06936199852104

n 1.26260287602835 -1.07494193039345 -0.03456900361923

o -0.59480281089696 -3.44155727272061 2.12703430747226

o -0.63282219758861 -3.63774941155567 -0.03538700541961

s -0.11970234589578 -0.47252327046120 2.56416853197058

fe -0.34369477397146 -1.86500169813341 0.94675792209763

1. [FeL(formate)]+ – sextet

C -2.962224 0.515804 -1.407350

C -1.926984 1.357431 -1.092196

C 2.283516 0.623207 -1.070798

C -3.502727 -1.940127 -0.852627

C 2.651635 -3.011902 -0.813317

C -2.691633 -0.707147 -0.805059

C 2.303495 -1.577406 -0.776224

C -0.745880 -4.169060 1.564507

C 0.178553 1.031458 0.256522

C 0.189840 1.133883 1.808578

C -0.912163 2.087928 2.244411

C 1.545804 1.659779 2.255222

C -1.713399 2.763449 -1.487657

C 2.562755 2.017752 -1.465982

C 2.978118 -0.519273 -1.373677

H 3.455143 2.039570 -2.070754

H 2.733590 2.661331 -0.613740

H -1.637999 3.425289 -0.635789

H -0.825481 2.886692 -2.094057

H 1.763573 2.443257 -2.058641

H -2.552231 3.093479 -2.079293

H 2.857663 -3.392285 0.176602

H -3.828781 -2.235247 0.133976

H -2.943720 -2.766801 -1.267829

H 1.847599 -3.605066 -1.225254

H -3.813237 0.758025 -2.005299

H 0.355170 2.034262 -0.093941

H -0.929184 -5.198118 1.857315

H -0.755366 3.070839 1.817022

H 3.867432 -0.580258 -1.961768

H 1.735237 2.636372 1.826577

H 2.352036 0.995777 1.985435

H -1.892962 1.736133 1.965106

H 1.556547 1.770954 3.328551

H -0.895145 2.196474 3.317928

H 3.526291 -3.159333 -1.426281

H -4.373119 -1.780427 -1.468551

N -1.086217 0.639498 -0.314474

N 1.240011 0.233201 -0.305112

N -1.540879 -0.616584 -0.142309

N 1.242575 -1.101908 -0.128319

O -1.705472 -3.375482 1.393087

O 0.429868 -3.756318 1.394668

S -0.090056 -0.452286 2.696654

Fe -0.331595 -1.866817 1.014139

1. Fe transition state

C -0.552581 4.398337 -0.290321

N -0.482008 5.431372 0.612073

O -1.248583 3.375940 0.054420

C -3.213020 -1.180339 0.686895

C 0.435687 -1.003106 -2.001012

C -0.583978 -1.767241 -2.834318

C 1.832697 -1.508960 -2.334059

C -1.982031 -3.400287 0.289458

C 2.111779 -2.994438 1.211868

C 2.723219 -0.598228 1.902447

C -2.131851 -1.930578 0.316837

C 2.005177 -1.520883 1.193919

C -3.664285 1.358449 0.764052

C 2.685807 1.987477 1.976855

C -2.836524 0.155605 0.536300

C 2.248148 0.654704 1.511826

C 0.164814 -1.330174 -0.506976

N -1.171237 -1.045277 -0.043062

N 1.145941 -0.814087 0.419922

N -1.589894 0.220633 0.098844

N 1.286318 0.504903 0.616828

O 1.043356 3.667084 -0.479949

S 0.342431 0.766318 -2.466127

Fe -0.109492 1.815378 -0.465100

H -0.637053 4.774946 -1.309064

H -0.369151 5.106096 1.550837

H 0.190097 6.132009 0.377479

H -4.156223 -1.552478 1.023459

H -0.524484 -2.839196 -2.667775

H -1.590606 -1.435234 -2.633843

H -0.386399 -1.586837 -3.879798

H 1.931544 -2.575105 -2.150775

H 2.589955 -0.983627 -1.773163

H 2.028703 -1.336738 -3.381316

H -2.908461 -3.852825 0.607289

H -1.759983 -3.776582 -0.700266

H -1.207746 -3.750817 0.960436

H 1.203890 -3.470592 1.559815

H 2.902243 -3.280079 1.888328

H 2.352154 -3.403915 0.239795

H 3.505252 -0.805760 2.600062

H -4.173757 1.642351 -0.149402

H -3.068170 2.201978 1.068980

H -4.419057 1.159325 1.510794

H 3.710891 2.173434 1.681801

H 2.072410 2.763779 1.550789

H 2.650293 2.046877 3.057639

H 0.258113 -2.400783 -0.428499

H 1.345655 3.807172 -1.375225

1. Fe tetrahedral intermediate – monodentate

C -0.178270 4.489252 -0.323709

N -0.186771 5.523619 0.674760

O -0.754279 3.328242 0.049499

C -3.226908 -1.155411 0.671940

C 0.425221 -1.144922 -2.023084

C -0.623388 -1.904790 -2.823678

C 1.803442 -1.705689 -2.347044

C -2.027421 -3.414412 0.408214

C 2.158589 -3.002103 1.222830

C 2.722373 -0.573275 1.848052

C -2.157501 -1.944131 0.345563

C 2.019993 -1.532119 1.170181

C -3.604147 1.410088 0.619692

C 2.587157 2.011969 1.891322

C -2.829646 0.163558 0.441211

C 2.201411 0.656914 1.443880

C 0.152741 -1.416766 -0.514971

N -1.182447 -1.097581 -0.066348

N 1.128899 -0.865611 0.397402

N -1.585911 0.176972 -0.003718

N 1.235122 0.460191 0.563995

O 1.170885 4.206574 -0.644581

S 0.391767 0.609461 -2.551288

Fe -0.136823 1.678340 -0.591918

H -0.673234 4.908456 -1.207390

H 0.094914 5.102183 1.544206

H -1.133128 5.833535 0.805516

H -4.174423 -1.492833 1.032162

H -0.601765 -2.969928 -2.612076

H -1.616964 -1.528963 -2.635794

H -0.422411 -1.775342 -3.876075

H 1.866583 -2.769650 -2.137726

H 2.580191 -1.192322 -1.801986

H 2.001215 -1.565646 -3.398651

H -2.958937 -3.834925 0.753833

H -1.811421 -3.853213 -0.556828

H -1.256207 -3.731352 1.099157

H 1.258460 -3.488986 1.576717

H 2.950590 -3.255478 1.910212

H 2.413176 -3.429205 0.262011

H 3.512971 -0.743553 2.546054

H -4.392967 1.478018 -0.119464

H -2.967842 2.275495 0.520122

H -4.072620 1.432597 1.594586

H 3.656902 2.071101 2.034953

H 2.290531 2.759957 1.172788

H 2.118713 2.251991 2.838538

H 0.235930 -2.484005 -0.395192

H 1.597656 5.043699 -0.807876

1. Fe tetrahedral intermediate – bidentate

C -2.863824 0.925473 -1.650472

C 2.381193 1.164664 -0.959298

C -3.454998 -1.516155 -1.038239

C 2.774539 -2.472231 -0.971074

C -2.633766 -0.288186 -0.998419

C 2.424211 -1.042467 -0.832594

C -0.673390 -4.118942 1.387584

C 0.162808 1.451556 0.194997

C 0.061395 1.557407 1.743287

C -1.167480 2.393199 2.073624

C 1.304184 2.288933 2.234689

C -1.572975 3.148259 -1.716702

C 2.658418 2.591807 -1.223616

C 3.129449 0.067671 -1.293588

C -1.832990 1.754379 -1.300681

H 1.102720 -4.003827 2.298333

H -0.276838 -5.235558 -0.199742

H -1.363811 -5.886564 0.788859

H 1.898887 3.051702 -1.843101

H 3.595811 2.675357 -1.751048

H -1.528504 3.830809 -0.878265

H -0.650634 3.244843 -2.275838

H 2.741650 3.170820 -0.314224

H -2.373598 3.478472 -2.360116

H 2.234891 -3.078430 -0.261244

H -4.421885 -1.336291 -0.584469

H -2.969367 -2.321335 -0.510593

H 2.540714 -2.828594 -1.967235

H -3.679289 1.168343 -2.296679

H 0.333572 2.456933 -0.152678

H -1.130000 3.376230 1.612913

H 4.064948 0.073108 -1.809280

H 1.380997 3.285872 1.810195

H 2.204626 1.737439 2.010958

H -2.077090 1.898950 1.771175

H 1.250546 2.392008 3.307623

H -1.214702 2.533622 3.142723

H 3.834317 -2.618360 -0.816163

H -3.633288 -1.818626 -2.062123

H -1.108617 -4.308212 2.376221

N -0.484749 -5.400707 0.771202

N -1.046965 1.035443 -0.465362

N 1.288964 0.693876 -0.314809

N -1.522656 -0.203633 -0.285037

N 1.309734 -0.645105 -0.240390

O -1.333268 -3.197654 0.688534

O 0.643173 -3.540313 1.602865

S -0.028535 -0.033766 2.633846

Fe -0.278531 -1.552219 0.923450

1. ZnL(formate) – monodentate

C -2.973154 0.563524 -1.277014

C -1.924522 1.384648 -0.956891

C 2.279629 0.642575 -0.958720

C -3.505536 -1.912097 -0.727587

C 2.641549 -2.995321 -0.723418

C -2.704746 -0.670541 -0.686878

C 2.312607 -1.554955 -0.684322

C -0.779347 -4.436882 0.355091

H -0.964439 -5.493311 0.587277

C 0.180630 1.027121 0.380950

C 0.201522 1.145706 1.931714

C -0.880033 2.141371 2.329330

C 1.561265 1.703603 2.330529

C -1.693918 2.793536 -1.336888

C 2.542640 2.044795 -1.342344

C 2.984713 -0.487620 -1.277863

H 1.743356 2.464972 -1.939695

H 3.440943 2.082630 -1.938423

H -2.522520 3.134866 -1.937393

H -1.623043 3.447523 -0.478238

H 2.693490 2.687377 -0.485432

H -0.795911 2.918958 -1.928513

H 3.466365 -3.172707 -1.396289

H -4.336030 -1.799783 -1.407465

H -3.903353 -2.148973 0.250842

H 2.925656 -3.354918 0.257184

H -3.822631 0.824272 -1.869587

H 0.356673 2.024624 0.014617

H -0.721610 3.115011 1.875191

H 3.871271 -0.533393 -1.871710

H 1.752384 2.670873 1.875379

H 2.360938 1.027389 2.071665

H -1.864526 1.785829 2.068242

H 1.585154 1.835069 3.401451

H -0.858921 2.272148 3.400392

H 1.789508 -3.572338 -1.052449

H -2.899289 -2.746709 -1.048581

N -1.090129 0.642826 -0.192716

N 1.243227 0.231280 -0.192502

N -1.557095 -0.602952 -0.035783

N 1.257798 -1.098707 -0.032554

O -0.713843 -4.065034 -0.804095

O -0.653329 -3.715845 1.408070

S -0.076701 -0.402724 2.875232

Zn -0.326693 -1.847716 1.170194

1. ZnL(formate) – bidentate

C -2.994417 0.523335 -1.342724

C -1.934433 1.342552 -1.059485

C 2.273263 0.602694 -1.062394

C -3.554462 -1.920539 -0.689400

C 2.688630 -3.016136 -0.686774

C -2.729005 -0.694196 -0.716064

C 2.329436 -1.582177 -0.714923

C -0.753515 -4.311657 1.203215

C 0.177592 1.013233 0.271155

C 0.206336 1.176305 1.816282

C -0.873519 2.182946 2.191525

C 1.567141 1.748022 2.192562

C -1.695215 2.736696 -1.486328

C 2.520875 1.994313 -1.492756

C 2.991499 -0.528413 -1.344745

H 1.715625 2.387517 -2.100289

H 3.416886 2.021571 -2.092942

H -2.528244 3.067408 -2.086748

H -1.607254 3.416511 -0.649606

H 2.668251 2.665992 -0.657813

H -0.803627 2.835255 -2.092515

H 3.275274 -3.249146 0.193651

H -4.191396 -1.937024 0.186778

H -2.931858 -2.801361 -0.666701

H 1.803466 -3.632863 -0.671228

H -3.847988 0.775002 -1.933571

H 0.350960 1.999527 -0.125566

H -0.941977 -5.386198 1.152610

H -0.718580 3.143842 1.709543

H 3.878705 -0.582739 -1.937135

H 1.754967 2.702546 1.709631

H 2.366758 1.065935 1.949432

H -1.859273 1.819743 1.946306

H 1.595557 1.909309 3.259299

H -0.846444 2.343343 3.258428

H 3.279933 -3.274497 -1.552676

H -4.192669 -1.965377 -1.559424

N -1.097661 0.614812 -0.282803

N 1.240662 0.204037 -0.282841

N -1.573225 -0.620160 -0.081691

N 1.268999 -1.118627 -0.079026

O -0.650188 -3.678663 0.118639

O -0.649982 -3.762646 2.310743

S -0.064961 -0.344225 2.800982

Zn -0.330924 -1.885804 1.177389

1. ZnL(OH)

C -3.036858 0.304094 -1.254958

C -1.980033 1.130162 -0.979246

C 2.242403 0.384003 -0.983353

C -3.559970 -2.154571 -0.594624

C 2.614554 -3.240014 -0.580919

C -2.757759 -0.912664 -0.628440

C 2.281335 -1.799781 -0.621812

H -0.722444 -4.101829 0.115907

C 0.140618 0.802356 0.350218

C 0.166785 0.948872 1.898902

C -0.911039 1.955179 2.279954

C 1.529162 1.512002 2.281586

C -1.750234 2.526389 -1.404478

C 2.499806 1.773381 -1.415178

C 2.954651 -0.753325 -1.256269

H 1.696730 2.171047 -2.023006

H 3.396273 1.795169 -2.014889

H -2.588185 2.855736 -1.998745

H -1.659392 3.204396 -0.566529

H 2.650576 2.444852 -0.580549

H -0.862361 2.629824 -2.015674

H 3.543218 -3.403744 -0.049022

H -4.491119 -1.995231 -0.065784

H -3.019626 -2.944196 -0.094951

H 1.837034 -3.797241 -0.080760

H -3.896801 0.552703 -1.838160

H 0.315670 1.793572 -0.033711

H -0.752616 2.918237 1.803582

H 3.846017 -0.814415 -1.842074

H 1.721835 2.467745 1.803121

H 2.325991 0.827526 2.036205

H -1.897220 1.595946 2.030710

H 1.556695 1.668705 3.349018

H -0.885253 2.109793 3.347732

H 2.741255 -3.635653 -1.580031

H -3.809603 -2.480583 -1.595754

N -1.132574 0.406669 -0.208738

N 1.201535 -0.005042 -0.208419

N -1.598792 -0.829017 -0.004060

N 1.221127 -1.324543 0.002755

O -0.687022 -3.903673 1.045234

S -0.110946 -0.572550 2.890341

Zn -0.373423 -2.110288 1.284871

1. [ZnL(H2O)]+

C -3.007627 0.428498 -1.326214

C -1.947105 1.246132 -1.030906

C 2.279790 0.490177 -1.025870

C -3.550125 -2.036364 -0.766051

C 2.633579 -3.146382 -0.771966

C -2.742390 -0.798786 -0.729587

C 2.299242 -1.707890 -0.742208

H -1.340245 -4.294217 0.794310

C 0.169250 0.894849 0.304559

C 0.191595 1.035478 1.861752

C -0.890205 2.032645 2.249130

C 1.555192 1.584953 2.253218

C -1.719017 2.650852 -1.423645

C 2.561497 1.887712 -1.409516

C 2.980985 -0.646554 -1.330972

H -0.597480 -4.211025 2.136456

H 1.760144 2.323147 -1.992159

H 3.450101 1.912264 -2.020072

H -2.545801 2.985036 -2.030054

H -1.654794 3.311282 -0.569862

H 2.739490 2.521474 -0.551625

H -0.819650 2.770486 -2.013567

H 3.608989 -3.319058 -0.337123

H -4.595222 -1.801250 -0.898611

H -3.458312 -2.596852 0.153727

H 1.913636 -3.734563 -0.224768

H -3.865352 0.692185 -1.905464

H 0.347005 1.891352 -0.062688

H -0.727528 2.997427 1.781629

H 3.874630 -0.698506 -1.913753

H 1.747866 2.543304 1.783950

H 2.353142 0.902461 2.005658

H -1.877429 1.678345 1.996623

H 1.581220 1.736724 3.321314

H -0.866161 2.182973 3.317489

H 2.666494 -3.511125 -1.789920

H -3.255408 -2.673594 -1.591283

N -1.103323 0.508897 -0.273717

N 1.229477 0.093403 -0.270251

N -1.580809 -0.735926 -0.097585

N 1.236132 -1.242081 -0.106354

O -0.633903 -3.847175 1.253959

S -0.092001 -0.497217 2.867655

Zn -0.309568 -1.803490 1.124362

1. [ZnL(OH)]+

C -3.073751 0.358483 -1.232651

C -1.992454 1.166046 -1.000012

C 2.271818 0.413076 -1.001297

C -3.641026 -2.078889 -0.569365

C 2.709938 -3.200021 -0.569835

C -2.808221 -0.860307 -0.611435

C 2.344665 -1.770001 -0.612322

H -0.790055 -4.499571 0.524939

C 0.144261 0.814290 0.295767

C 0.163507 0.922208 1.849588

C -0.938466 1.874753 2.304662

C 1.521915 1.447923 2.304685

C -1.750198 2.554037 -1.440911

C 2.518984 1.799790 -1.443540

C 3.011102 -0.716002 -1.234162

H 1.726596 2.172516 -2.079539

H 3.430367 1.828523 -2.019017

H -2.594918 2.892048 -2.019542

H -1.633518 3.239422 -0.611884

H 2.640007 2.485408 -0.615364

H -0.875728 2.634669 -2.073397

H 3.719073 -3.320258 -0.200602

H -4.631433 -1.845873 -0.203457

H -3.211330 -2.833521 0.071038

H 2.045943 -3.762263 0.068296

H -3.946826 0.619597 -1.789796

H 0.320732 1.815984 -0.058138

H -0.785470 2.849969 1.859725

H 3.920414 -0.769738 -1.791943

H 1.706616 2.417764 1.860045

H 2.332243 0.787386 2.037345

H -1.923904 1.525747 2.037181

H 1.529839 1.574624 3.376275

H -0.903220 1.997025 3.376218

H 2.678685 -3.630228 -1.562338

H -3.756004 -2.495300 -1.561607

N -1.130201 0.431906 -0.255027

N 1.210885 0.018839 -0.255387

N -1.622097 -0.798445 -0.023728

N 1.251813 -1.305519 -0.023965

O -0.695917 -3.925638 1.277946

S -0.107926 -0.635945 2.744940

Zn -0.386740 -2.194516 0.871613

1. [ZnL(formate)]+

C -3.022933 0.626321 -1.271450

C -1.938988 1.415382 -0.988958

C 2.305695 0.666338 -0.990686

C -3.626154 -1.826628 -0.716583

C 2.780451 -2.957612 -0.719118

C -2.778713 -0.617034 -0.697925

C 2.398936 -1.530808 -0.699858

C -0.771312 -4.387004 0.668080

H -0.958057 -5.455236 0.737747

C 0.177934 1.007521 0.310185

C 0.190182 1.069767 1.865143

C -0.911803 2.010408 2.345219

C 1.547156 1.579455 2.343082

C -1.683443 2.818414 -1.370963

C 2.543943 2.071470 -1.376193

C 3.053647 -0.446222 -1.273901

H 1.760013 2.457911 -2.014488

H 3.465752 2.130931 -1.932492

H -2.513605 3.178923 -1.957132

H -1.587368 3.471807 -0.513913

H 2.641451 2.728056 -0.521963

H -0.794230 2.922187 -1.978785

H 3.635467 -3.105700 -1.359033

H -4.469320 -1.680281 -1.372463

H -4.008514 -2.047815 0.271783

H 3.043326 -3.302941 0.272568

H -3.884123 0.914828 -1.833259

H 0.355843 2.018421 -0.015288

H -0.755780 2.998945 1.931902

H 3.961475 -0.469925 -1.835856

H 1.736069 2.562323 1.929937

H 2.358292 0.926529 2.059656

H -1.897101 1.672227 2.063350

H 1.548632 1.672062 3.418125

H -0.879895 2.097851 3.420223

H 1.970074 -3.574035 -1.081363

H -3.070823 -2.688166 -1.058612

N -1.096221 0.647098 -0.258548

N 1.250907 0.232965 -0.260247

N -1.602197 -0.589166 -0.084108

N 1.302961 -1.101800 -0.086191

O -0.680318 -3.836913 -0.449622

O -0.650114 -3.723820 1.733320

S -0.087628 -0.516767 2.692681

Zn -0.359565 -2.040268 0.655996

1. Zn transition state

C -2.886582 1.006682 -1.679962

C -0.916710 2.629667 2.099684

C 1.433307 1.861309 2.282060

C -1.709918 3.276106 -1.433531

C 2.500058 2.492854 -1.439960

C 3.053467 -0.013226 -1.309812

C -1.900697 1.827652 -1.209579

C 2.283749 1.086470 -1.041549

C -3.357338 -1.517225 -1.436516

C 2.800041 -2.523932 -0.734587

C -2.597585 -0.272167 -1.194923

C 2.408096 -1.098645 -0.717218

C -1.026898 -4.138696 1.262388

C 0.130269 1.413113 0.209580

C 0.048767 1.500540 1.761022

H 0.916718 -3.209992 2.549858

H -0.487019 -5.200175 -0.324121

H -0.170733 -5.946683 1.138497

H 1.713899 2.861629 -2.086536

H 3.426321 2.563843 -1.988580

H -1.784186 3.850491 -0.520085

H -0.755729 3.504984 -1.891504

H 2.574330 3.158937 -0.590526

H -2.477517 3.630118 -2.104107

H 2.325538 -3.056098 0.076795

H -4.384960 -1.399571 -1.117031

H -2.924802 -2.345001 -0.901472

H 2.507089 -2.987653 -1.669568

H -3.707119 1.294551 -2.300947

H 0.332543 2.419328 -0.117359

H -0.581674 3.582183 1.699902

H 3.965868 -0.026962 -1.865293

H 1.813685 2.774455 1.833254

H 2.141422 1.066387 2.109370

H -1.911378 2.421364 1.736976

H 1.375218 2.018860 3.348173

H -0.980581 2.727968 3.172709

H 3.873624 -2.620109 -0.650773

H -3.376782 -1.750969 -2.493996

H -1.219960 -4.272217 2.324131

N -0.750709 -5.311048 0.633488

N -1.086468 1.037682 -0.466709

N 1.237440 0.641347 -0.308631

N -1.499360 -0.237168 -0.461675

N 1.307571 -0.681101 -0.114658

O -1.542617 -3.191710 0.617154

O 0.688898 -3.265168 1.624814

S -0.552420 0.009191 2.632836

Zn -0.268174 -1.592197 1.058517

1. Zn tetrahedral intermediate

C -0.132031 4.417665 -0.370552

N -0.257486 5.533720 0.531499

O -0.695662 3.279418 0.074704

C -3.220127 -1.145246 0.699120

C 0.420370 -1.125553 -2.027330

C -0.618198 -1.896146 -2.831491

C 1.804739 -1.670928 -2.352401

C -2.041581 -3.408251 0.377089

C 2.169810 -3.004173 1.191846

C 2.709118 -0.580862 1.858988

C -2.160668 -1.935939 0.343208

C 2.019001 -1.534628 1.160921

C -3.564199 1.428906 0.715170

C 2.538212 2.001579 1.957661

C -2.813093 0.175029 0.493757

C 2.174775 0.651359 1.477984

C 0.149355 -1.406241 -0.521890

N -1.185161 -1.090140 -0.065863

N 1.126964 -0.863558 0.394561

N -1.576598 0.184690 0.033399

N 1.216695 0.458366 0.590109

O 1.250468 4.177380 -0.568368

S 0.367248 0.628137 -2.564680

Zn -0.123102 1.649637 -0.629053

H -0.568084 4.745362 -1.323420

H -0.009316 5.197065 1.447382

H -1.228606 5.786138 0.583629

H -4.165231 -1.483082 1.065163

H -0.576960 -2.962819 -2.631276

H -1.617359 -1.538896 -2.637083

H -0.423929 -1.752699 -3.883401

H 1.880142 -2.734750 -2.147042

H 2.575720 -1.149849 -1.806655

H 2.000859 -1.525599 -3.403699

H -2.970781 -3.828163 0.729369

H -1.843330 -3.829940 -0.599126

H -1.262208 -3.743008 1.050133

H 1.270666 -3.503662 1.530142

H 2.957782 -3.261639 1.882240

H 2.436202 -3.413661 0.226724

H 3.497764 -0.756042 2.557965

H -4.386559 1.509658 0.015166

H -2.919966 2.285382 0.589786

H -3.985594 1.450444 1.711409

H 3.608767 2.079245 2.085938

H 2.212520 2.764004 1.267794

H 2.081054 2.199571 2.919807

H 0.232495 -2.474525 -0.411037

H 1.645101 5.017245 -0.788294

1. CoL(formate) – monodentate doublet

C -2.954572 0.494733 -1.212957

C -1.902083 1.338119 -0.979291

C 2.317859 0.625084 -0.914662

C -3.484158 -1.925350 -0.465651

C 2.530068 -3.023766 -0.658729

C -2.686008 -0.684188 -0.516300

C 2.262705 -1.571939 -0.616586

C -0.805350 -4.417582 -0.065570

H -0.940672 -5.476927 0.202880

C 0.201809 1.079878 0.383188

C 0.221086 1.226095 1.928379

C -0.928888 2.131555 2.341834

C 1.541702 1.862176 2.334180

C -1.669980 2.711575 -1.470909

C 2.640217 2.015211 -1.297649

C 2.982015 -0.534655 -1.211681

H 1.884721 2.456433 -1.936840

H 3.567468 2.019377 -1.849987

H -2.502433 3.006328 -2.090922

H -1.594364 3.433083 -0.667279

H 2.769816 2.662189 -0.440167

H -0.775012 2.789980 -2.076040

H 3.468888 -3.214713 -1.155247

H -4.441601 -1.771847 -0.939293

H -3.653215 -2.238952 0.554844

H 2.580499 -3.442314 0.336854

H -3.809568 0.701324 -1.818736

H 0.372470 2.066956 -0.013591

H -0.857741 3.102540 1.863376

H 3.873757 -0.622316 -1.793445

H 1.661237 2.843222 1.886291

H 2.385349 1.248223 2.057625

H -1.887617 1.697423 2.104335

H 1.565755 1.985974 3.406407

H -0.894812 2.289162 3.409266

H 1.739191 -3.536840 -1.188096

H -2.964066 -2.724925 -0.974636

N -1.065332 0.662969 -0.157440

N 1.256517 0.258918 -0.158756

N -1.532225 -0.561727 0.117849

N 1.218879 -1.068316 0.019265

O -0.840263 -4.084746 -1.237062

O -0.623167 -3.671908 0.958909

S 0.053543 -0.361967 2.816168

Co -0.282425 -1.773548 1.185875

1. CoL(formate) – bidentate doublet

C -3.015403 0.488980 -1.305200

C -1.924946 1.298295 -1.130061

C 2.329573 0.587432 -0.977498

C -3.655295 -1.845895 -0.399143

C 2.520540 -3.062352 -0.767808

C -2.777914 -0.668803 -0.565881

C 2.241989 -1.610184 -0.730595

C -0.370629 -4.168311 0.997535

C 0.173298 1.038520 0.240064

C 0.143283 1.184025 1.780504

C -0.957836 2.171007 2.143860

C 1.483372 1.740682 2.239699

C -1.645752 2.635789 -1.690430

C 2.673915 1.983108 -1.319456

C 3.002167 -0.569263 -1.266810

H 1.916833 2.458939 -1.930916

H 3.591908 1.989420 -1.886359

H -2.477874 2.940700 -2.305730

H -1.516584 3.387990 -0.922971

H 2.828205 2.599045 -0.443556

H -0.762050 2.640886 -2.316357

H 2.620539 -3.460138 0.232440

H -4.030592 -1.904756 0.614965

H -3.123315 -2.762252 -0.603346

H 1.717726 -3.598233 -1.254220

H -3.878808 0.707324 -1.894797

H 0.353630 2.021904 -0.162397

H -0.301052 -5.256745 1.035817

H -0.796654 3.145550 1.691363

H 3.923420 -0.649251 -1.801937

H 1.677799 2.721687 1.816776

H 2.296320 1.077392 1.989224

H -1.932041 1.807532 1.856886

H 1.473290 1.845925 3.314222

H -0.968649 2.306124 3.214900

H 3.436251 -3.255517 -1.305580

H -4.502273 -1.773606 -1.064392

N -1.091308 0.624031 -0.307513

N 1.228469 0.207505 -0.286880

N -1.597683 -0.569325 0.029461

N 1.165903 -1.120725 -0.141919

O -0.949188 -3.611651 0.034707

O 0.137538 -3.484338 1.917256

S -0.135946 -0.406771 2.627964

Co -0.524176 -1.831674 1.004107

1. CoL(formate) – bidentate quartet

C -2.994708 0.534385 -1.341521

C -1.939900 1.356719 -1.055972

C 2.278436 0.628463 -1.087711

C -3.525900 -1.927930 -0.775673

C 2.633648 -3.006866 -0.884285

C -2.714852 -0.692726 -0.737370

C 2.298738 -1.568815 -0.815969

C -0.742386 -4.264693 1.591293

C 0.182988 1.017181 0.248737

C 0.222033 1.136483 1.796114

C -0.878970 2.098496 2.220899

C 1.572859 1.719117 2.188473

C -1.715881 2.762050 -1.453208

C 2.550567 2.032335 -1.459457

C 2.980180 -0.501893 -1.404471

H 1.752072 2.465113 -2.049134

H 3.446800 2.069171 -2.058853

H -2.556483 3.099313 -2.039333

H -1.626335 3.424301 -0.602455

H 2.709545 2.666108 -0.597372

H -0.829908 2.881550 -2.064244

H 2.111741 -3.567487 -0.126907

H -4.573671 -1.691812 -0.652693

H -3.230049 -2.615433 -0.000942

H 2.371568 -3.414368 -1.853517

H -3.858939 0.789060 -1.915476

H 0.350927 2.013027 -0.126614

H -0.925562 -5.307539 1.859993

H -0.753782 3.078722 1.770917

H 3.873124 -0.549739 -1.988883

H 1.733949 2.697264 1.745485

H 2.385610 1.067029 1.908507

H -1.858018 1.719573 1.972253

H 1.608076 1.836181 3.260902

H -0.843485 2.223659 3.292389

H 3.697269 -3.149926 -0.752837

H -3.418313 -2.425397 -1.732418

N -1.089803 0.621105 -0.301549

N 1.233620 0.216890 -0.331549

N -1.552118 -0.621437 -0.110547

N 1.238589 -1.113025 -0.169207

O -1.717477 -3.488029 1.480420

O 0.437207 -3.886528 1.405506

S -0.007260 -0.438939 2.688618

Co -0.315746 -1.920714 1.059659

1. CoL(OH) – doublet

C -3.046273 0.279153 -1.222571

C -1.983658 1.107169 -0.981915

C 2.250160 0.369083 -0.963556

C -3.593737 -2.143880 -0.473963

C 2.617759 -3.246796 -0.511564

C -2.771536 -0.917867 -0.556232

C 2.275237 -1.809793 -0.571748

H -0.633438 -3.929810 -0.313213

C 0.139867 0.811550 0.341282

C 0.172427 0.969187 1.885503

C -0.919724 1.951646 2.283886

C 1.526978 1.541881 2.277006

C -1.745023 2.486832 -1.453832

C 2.517059 1.752652 -1.408357

C 2.963234 -0.772866 -1.207633

H 1.724436 2.145535 -2.033013

H 3.422583 1.765089 -1.994746

H -2.587671 2.806830 -2.046755

H -1.635509 3.190899 -0.639428

H 2.657240 2.434969 -0.580411

H -0.864524 2.561824 -2.079883

H 3.528361 -3.400502 0.053706

H -4.430996 -2.000632 0.198242

H -3.005860 -2.971168 -0.107307

H 1.825561 -3.806377 -0.039637

H -3.909184 0.512063 -1.807969

H 0.311841 1.795525 -0.062829

H -0.778966 2.920244 1.813760

H 3.864567 -0.845716 -1.776722

H 1.705697 2.505939 1.810681

H 2.333627 0.873129 2.019832

H -1.901678 1.580958 2.034171

H 1.553629 1.685190 3.346497

H -0.890675 2.098597 3.352798

H 2.784146 -3.645260 -1.503822

H -3.998332 -2.400014 -1.443682

N -1.135802 0.402920 -0.193765

N 1.194586 -0.009047 -0.202309

N -1.606354 -0.823442 0.057959

N 1.203608 -1.326226 0.028974

O -0.659607 -3.808812 0.630742

S -0.086428 -0.586868 2.808390

Co -0.387627 -2.103787 1.233431

1. CoL(OH) – quartet

C -3.037266 0.271571 -1.221374

C -1.977643 1.103635 -0.980861

C 2.258646 0.371636 -0.957924

C -3.576743 -2.152776 -0.473472

C 2.596114 -3.252346 -0.544411

C -2.757672 -0.924843 -0.556534

C 2.267665 -1.811618 -0.589861

H -0.698939 -3.983782 -0.272478

C 0.146109 0.815802 0.345106

C 0.173077 0.978171 1.889683

C -0.929319 1.952957 2.278881

C 1.520936 1.569819 2.276923

C -1.744481 2.484670 -1.451432

C 2.534768 1.757488 -1.389521

C 2.962055 -0.773627 -1.215906

H 1.744250 2.161309 -2.009928

H 3.440072 1.769584 -1.976256

H -2.586553 2.800617 -2.047336

H -1.641399 3.188579 -0.636135

H 2.679329 2.430175 -0.554636

H -0.862038 2.563819 -2.074239

H 3.495566 -3.422612 0.034042

H -4.422874 -2.004931 0.186556

H -2.991263 -2.974756 -0.091112

H 1.790693 -3.811244 -0.093586

H -3.902004 0.501699 -1.805111

H 0.317213 1.799238 -0.060783

H -0.799000 2.920057 1.802387

H 3.861959 -0.847577 -1.787014

H 1.687522 2.534639 1.807263

H 2.335068 0.909182 2.022263

H -1.907075 1.569328 2.032508

H 1.546789 1.716990 3.345880

H -0.902142 2.107414 3.346771

H 2.775398 -3.637489 -1.539629

H -3.968434 -2.418903 -1.445851

N -1.125815 0.402110 -0.195166

N 1.202579 -0.004531 -0.197251

N -1.591140 -0.826497 0.055024

N 1.201763 -1.324487 0.018697

O -0.683305 -3.823572 0.664360

S -0.065305 -0.574041 2.826556

Co -0.367163 -2.110856 1.234906

1. [CoL(H2O)]+ – doublet

C -2.996277 0.497604 -1.472185

C -1.924810 1.297783 -1.170048

C 2.303516 0.456163 -0.914055

C -3.632019 -1.931670 -0.841126

C 2.342236 -3.199327 -1.092980

C -2.786053 -0.720893 -0.832134

C 2.134837 -1.752886 -0.871079

H -0.356013 -4.138080 2.161354

C 0.122636 0.889918 0.270557

C 0.013261 0.925631 1.820155

C -1.017627 1.974972 2.207997

C 1.368086 1.290828 2.404720

C -1.646770 2.689944 -1.574571

C 2.700235 1.860421 -1.138974

C 2.937234 -0.696608 -1.294101

H 0.799476 -3.168462 2.385507

H 1.988487 2.390336 -1.759253

H 3.646446 1.880134 -1.655327

H -2.450846 3.041944 -2.201685

H -1.580924 3.357364 -0.725082

H 2.821315 2.414078 -0.218244

H -0.730475 2.773844 -2.144875

H 3.378722 -3.396171 -1.317551

H -4.676531 -1.659154 -0.867936

H -3.471883 -2.536639 0.040146

H 2.062661 -3.784490 -0.230599

H -3.832518 0.765267 -2.080168

H 0.353788 1.896695 -0.035968

H -0.727588 2.957716 1.855325

H 3.864645 -0.765942 -1.817965

H 1.690103 2.264273 2.055799

H 2.122240 0.560134 2.159379

H -2.000456 1.740962 1.828790

H 1.295131 1.344533 3.480123

H -1.089687 2.028195 3.283773

H 1.755585 -3.547698 -1.934392

H -3.433732 -2.542393 -1.713051

N -1.121544 0.558366 -0.372559

N 1.176259 0.065964 -0.273892

N -1.636304 -0.661501 -0.173235

N 1.067530 -1.274176 -0.247932

O 0.242816 -3.549551 1.705202

S -0.489938 -0.684695 2.545251

Co -0.585251 -1.912732 0.766888

1. [CoL(H2O)]+ – quartet

C -3.006680 0.543811 -1.449643

C -1.948510 1.339974 -1.096898

C 2.248325 0.475949 -1.017052

C -3.585073 -1.935612 -0.984028

C 2.482494 -3.173603 -0.846227

C -2.770056 -0.706721 -0.885928

C 2.201551 -1.725058 -0.762744

H -0.758882 -4.527720 1.790844

C 0.126243 0.904224 0.280163

C 0.100636 0.962458 1.836725

C -0.943475 1.986308 2.258015

C 1.473890 1.399557 2.322965

C -1.689802 2.754337 -1.432503

C 2.568943 1.872429 -1.373613

C 2.921337 -0.675396 -1.328278

H 0.369663 -3.810113 2.533759

H 1.804141 2.321868 -1.993822

H 3.488133 1.889745 -1.937228

H -2.505454 3.129632 -2.029720

H -1.616596 3.380460 -0.553803

H 2.710832 2.499505 -0.503915

H -0.784263 2.877644 -2.012396

H 3.547519 -3.351775 -0.840673

H -4.630817 -1.689407 -1.088917

H -3.479522 -2.553081 -0.102802

H 2.043839 -3.715446 -0.023162

H -3.845409 0.834579 -2.043403

H 0.340170 1.910500 -0.038632

H -0.708011 2.968045 1.863789

H 3.822171 -0.746352 -1.897623

H 1.739669 2.370802 1.922241

H 2.243095 0.690509 2.059545

H -1.936532 1.709027 1.939900

H 1.462468 1.486351 3.398597

H -0.956721 2.064651 3.334183

H 2.091418 -3.588986 -1.767032

H -3.302062 -2.526021 -1.846877

N -1.132511 0.565667 -0.344073

N 1.176935 0.093628 -0.283523

N -1.625475 -0.676638 -0.220998

N 1.143149 -1.239481 -0.129935

O -0.084791 -3.859283 1.695068

S -0.319465 -0.623075 2.670013

Co -0.476514 -1.907894 0.929638

1. [CoL(OH)]+ – singlet

c -3.08082491142287 0.23781395137819 -1.12273379388109

c -2.04013909224840 1.11347165754548 -0.96331512796097

c 2.31215299338800 0.35325744762177 -0.94468785463857

c -3.53205067924761 -2.18079122485939 -0.35237457681514

c 2.54870618969364 -3.26774692138773 -0.41860865164462

c -2.72950108014469 -0.95162742128928 -0.48780454137187

c 2.22607710433939 -1.83312629149622 -0.52510206304359

h -0.67428510227328 -3.95301378280277 -0.61486629048150

c 0.15958262109667 0.89832299804085 0.27609822987423

c 0.18074618512536 1.01374154771453 1.81956637521921

c -0.93262581048153 1.94399946779080 2.27587869123976

c 1.52639801492222 1.55878172041142 2.27249975047363

c -1.88389515041898 2.49637999587509 -1.45318204043742

c 2.65996952576750 1.71480773024132 -1.39435731777645

c 2.98256923801219 -0.82708403393046 -1.12272661891371

h 1.90804012639020 2.12913617655099 -2.05370088539405

h 3.58634507713325 1.67813434214485 -1.94494596856328

h -2.76075377243969 2.77179179579841 -2.01706033510804

h -1.77912287465676 3.20900463955877 -0.64619747155445

h 2.79988576497348 2.39726994336676 -0.56699693562327

h -1.03065112243987 2.59946706308114 -2.11137177822087

h 3.36240365636278 -3.41150776507620 0.28115446407464

h -4.29593007419328 -2.04330334808990 0.40296914600036

h -2.92421706428355 -3.02471138605785 -0.07096955319128

h 1.70358810550039 -3.84333893914868 -0.08010202621411

h -3.99366087836211 0.42846183494386 -1.64337007857899

h 0.33251305473228 1.88035294314684 -0.13199181089816

h -0.79085105476417 2.94190738427566 1.87810506628271

h 3.91271390313953 -0.95567381571314 -1.63161515132885

h 1.68995935631889 2.55699540169621 1.88415913432728

h 2.34698779100726 0.92407948452212 1.97727634190842

h -1.90953839005667 1.58574973784863 1.99229929863417

h 1.54157836087181 1.62621180530777 3.34965615782480

h -0.91623576445791 2.02126171905532 3.35231120465361

h 2.87585456307250 -3.64922852399994 -1.37529674638262

h -4.03434924100002 -2.40133947493821 -1.28294624443344

n -1.10688390704109 0.45597849036092 -0.23984996502430

n 1.19439877279800 0.04732743756520 -0.24886135076813

n -1.51794888650806 -0.79165927613407 0.03731184619926

n 1.13671279286943 -1.27303952593640 -0.00774733972680

o -0.63999268972558 -3.58577816425317 0.26326684349731

s -0.07109940069824 -0.64273846598669 2.54015591714068

co -0.34262625065046 -1.94799835474285 0.85007405062554

1. [CoL(OH)]+ – triplet

c -2.98562675179112 0.29285125298053 -1.34030372586079

c -1.98978819195171 1.16222098393628 -0.98763127993603

c 2.26267914301917 0.42789529658266 -1.07518213865946

c -3.34881228692976 -2.24078414573325 -0.96838735094871

c 2.63872234747220 -3.19829860650368 -0.65662155788704

c -2.62940034192204 -0.95817251581028 -0.83412634217011

c 2.30986365585306 -1.75898968957227 -0.68730646806263

h -1.65199923570155 -3.22733898154409 2.46171075197486

c 0.16196467706337 0.82685402624390 0.29410459807172

c 0.20335304767881 0.82896616252385 1.84857411862525

c -0.92837404336624 1.70004255934609 2.37387272352048

c 1.54664599988189 1.37693356326296 2.30686734705915

c -1.85290630104145 2.60443483027665 -1.27302484402524

c 2.51949379882397 1.81269996804514 -1.51500218422076

c 2.96822800533704 -0.71966130053295 -1.33687209514711

h 1.70806440490092 2.20577350021379 -2.11345890292976

h 3.40786592259814 1.83129246923421 -2.12568562638482

h -2.70984012483323 2.93460993996242 -1.83811559364099

h -1.80952392170095 3.20247731259350 -0.37287838928346

h 2.68370383498252 2.48371783442313 -0.68252692999614

h -0.97476925389729 2.82321655597077 -1.86726299673133

h 3.70905412449191 -3.33930134831209 -0.65804751442363

h -4.40844875657180 -2.09544029015279 -0.81671022499840

h -2.99588821535832 -2.96864015805882 -0.25556376688464

h 2.24119472684598 -3.68270082716069 0.22378058411701

h -3.86327016825643 0.53184927510111 -1.90017637695810

h 0.32377726334455 1.84848766365581 -0.00636855450473

h -0.80947736337346 2.72115029847964 2.03299340107159

h 3.85793146508757 -0.79381499368587 -1.92302637085732

h 1.68788339200863 2.38954581619526 1.94873086098525

h 2.37297962718904 0.76846953964922 1.97471040732491

h -1.89723219234843 1.33715195881568 2.06924992757152

h 1.57964130156440 1.41254727646403 3.38539017210591

h -0.90744497936188 1.71965316653202 3.45298985348280

h 2.24321372192903 -3.70506898983730 -1.52808456377311

h -3.21954117442199 -2.64709120147738 -1.96383718457173

n -1.09141039371881 0.42871802790115 -0.28500782997298

n 1.22763934184873 0.05679620152651 -0.28932842897468

n -1.47226890227458 -0.85534137828768 -0.19920421902005

n 1.24797802358777 -1.26116729446714 -0.06275807321512

o -1.14088523314537 -3.34622605884109 1.66398846245930

s -0.00658468107427 -0.83528114493199 2.60564530681952

co -0.20838531246792 -2.09503655500698 0.91989101884963

1. [CoL(OH)]+ – quintet

C -3.068476 0.334612 -1.235867

C -1.993282 1.154386 -1.016470

C 2.272126 0.409995 -1.011572

C -3.627518 -2.090790 -0.528349

C 2.679920 -3.205472 -0.560356

C -2.797412 -0.871771 -0.592920

C 2.321896 -1.774259 -0.612822

H -0.760295 -4.295552 0.388058

C 0.144480 0.824075 0.299048

C 0.158798 0.899968 1.857413

C -0.944459 1.844820 2.311220

C 1.515905 1.419175 2.309777

C -1.758076 2.537475 -1.475509

C 2.536036 1.794420 -1.450622

C 2.996940 -0.729413 -1.241238

H 1.745962 2.179598 -2.081856

H 3.445970 1.813334 -2.028786

H -2.613097 2.871681 -2.041056

H -1.623945 3.229315 -0.654843

H 2.667932 2.473721 -0.619132

H -0.895187 2.608902 -2.124780

H 3.716987 -3.322383 -0.279348

H -4.645562 -1.838263 -0.267977

H -3.253438 -2.788252 0.204468

H 2.073311 -3.741396 0.152406

H -3.945139 0.580599 -1.794207

H 0.320341 1.831872 -0.037397

H -0.794724 2.830773 1.888434

H 3.906620 -0.796529 -1.796909

H 1.704395 2.399282 1.888961

H 2.322283 0.759135 2.030750

H -1.926116 1.492945 2.035101

H 1.528959 1.521123 3.384050

H -0.919880 1.946922 3.385266

H 2.556920 -3.666891 -1.531840

H -3.656164 -2.586195 -1.490500

N -1.125325 0.437914 -0.263040

N 1.206501 0.030375 -0.266796

N -1.609493 -0.790051 -0.011325

N 1.233542 -1.291923 -0.030592

O -0.633461 -3.735802 1.150770

S -0.115186 -0.697441 2.741027

Co -0.349590 -2.004035 1.019358

1. [CoL(formate)]+ – singlet

C -2.996087 0.496768 -1.336077

C -1.971735 1.366838 -1.065606

C 2.321386 0.621402 -1.087141

C -3.442240 -1.979667 -0.803895

C 2.517066 -3.034951 -0.933127

C -2.658661 -0.728509 -0.771058

C 2.227422 -1.589069 -0.856313

C -0.636723 -3.809022 1.735684

C 0.192561 1.062191 0.207098

C 0.201432 1.052062 1.750538

C -0.925693 1.935437 2.265318

C 1.540737 1.575810 2.248532

C -1.815504 2.786544 -1.436373

C 2.670787 2.014774 -1.424669

C 2.970830 -0.545577 -1.397000

H 1.918817 2.482724 -2.047166

H 3.596060 2.022227 -1.978153

H -2.673166 3.097608 -2.011013

H -1.752366 3.432117 -0.570807

H 2.812820 2.627548 -0.545042

H -0.939052 2.953035 -2.049276

H 2.667129 -3.457924 0.048556

H -4.358857 -1.814888 -1.346997

H -3.686152 -2.316540 0.192214

H 1.711266 -3.580436 -1.404770

H -3.887553 0.718460 -1.880542

H 0.365844 2.076408 -0.111783

H -0.795258 -4.761609 2.229640

H -0.792767 2.961794 1.943720

H 3.878203 -0.636632 -1.952512

H 1.691034 2.604861 1.943891

H 2.367561 0.975755 1.903132

H -1.895466 1.585839 1.949000

H 1.557947 1.557502 3.327876

H -0.919284 1.935950 3.344813

H 3.409085 -3.192207 -1.517661

H -2.904331 -2.777500 -1.297060

N -1.066026 0.660616 -0.357107

N 1.230413 0.259818 -0.380122

N -1.470231 -0.605316 -0.179880

N 1.163466 -1.072546 -0.242161

O -1.597147 -3.042750 1.463380

O 0.515526 -3.425646 1.404459

S -0.030667 -0.643357 2.394732

Co -0.312425 -1.849943 0.630732

1. [CoL(formate)]+ – triplet

c -2.97352718054419 0.48203367154686 -1.35868878433404

c -1.96466702397963 1.35586598949333 -1.05101981100470

c 2.29701962185167 0.61679244181726 -1.08125645818329

c -3.40448431134239 -2.00908963979436 -0.86926113547964

c 2.48773599269303 -3.04084260567214 -0.96396675800064

c -2.63938103825831 -0.74817814389608 -0.79952808251532

c 2.20605036784712 -1.59468743620301 -0.86698730462983

c -0.65001800451109 -3.88925659569667 1.71269047421714

c 0.18685580525584 1.05375771740584 0.23961961067470

c 0.20580506244602 1.09434158686495 1.78905417655328

c -0.89603740618363 2.02249187402911 2.28199796533777

c 1.56086421065668 1.60170783490619 2.26335197090849

c -1.80941027663033 2.77983563764821 -1.40663780748564

c 2.63624632395706 2.01229818472021 -1.42175459634300

c 2.93835263436795 -0.54607058096709 -1.41666072970729

h 1.86704022600819 2.48445086999108 -2.01977634667446

h 3.54423687536168 2.02172148845954 -2.00337486151444

h -2.64825145151998 3.08484791822886 -2.01168780535436

h -1.78681029402546 3.42153118263713 -0.53612716377036

h 2.80652952363971 2.62227834619583 -0.54513119571288

h -0.91298274199323 2.96173294528400 -1.98554391491576

h 2.77361979791352 -3.44918927178822 -0.00551932207886

h -4.24162183741849 -1.88762845187404 -1.53793776404790

h -3.78069831062487 -2.29372043316172 0.10263842791358

h 1.62617732415394 -3.59435546688989 -1.30908976248311

h -3.84963122511064 0.70256639583717 -1.92811765557645

h 0.35884368596211 2.06106860529629 -0.10114328080588

h -0.79934693760539 -4.85665186321283 2.18013761196649

h -0.74335689112853 3.02653317920880 1.90504593259632

h 3.82985390840200 -0.63151755799438 -1.99837666848777

h 1.74374188969773 2.60131876345245 1.88822374992950

h 2.37144317363914 0.95934087731245 1.95545353067392

h -1.87875904966804 1.68583691351233 1.98986903960557

h 1.57289267905186 1.65327254441813 3.34126241876807

h -0.87260176406925 2.07409443261331 3.35973374916990

h 3.29400070811086 -3.20677571564884 -1.66040022998102

h -2.79829502305888 -2.82553454355986 -1.23470439314685

n -1.07516498802689 0.64982717119574 -0.31848905351167

n 1.22644155286865 0.24828202299196 -0.34299878059016

n -1.47510558845651 -0.62275581750330 -0.16964854355503

n 1.16385986393832 -1.08653058277576 -0.21679291183043

o -1.61733615972431 -3.13327197085440 1.43739524312929

o 0.50336234866247 -3.47143632998807 1.42507134870274

s -0.06492313379777 -0.54581299440478 2.52936969744977

co -0.31856293880780 -1.84452259318166 0.75970617412416

1. [CoL(formate)]+ – quintet

c -3.00814598434707 0.56588006389803 -1.25033314285750

c -1.93350059583943 1.37772094995331 -1.00421007604644

c 2.28961303859425 0.63211313497694 -0.99628927133656

c -3.60040498822570 -1.85828698138288 -0.57709125435853

c 2.73759235169963 -2.98159189560906 -0.58191755104101

c -2.76180475211429 -0.64347888715219 -0.60461507539091

c 2.36595552692800 -1.55281639501905 -0.60736747878957

c -0.74895510491309 -4.24070834422391 0.26880727242955

h -0.93066814109766 -5.31282622583935 0.31746357810837

c 0.18056625822092 1.03205742689293 0.33396750123311

c 0.19345360893086 1.10279894530933 1.88828747069109

c -0.90537486324591 2.04587129318961 2.35835573180141

c 1.55335470690038 1.59965191935838 2.35960905476801

c -1.67881051343635 2.75890985000976 -1.45887038721976

c 2.53240599566426 2.01866404284824 -1.44131445287545

c 3.01907910343130 -0.49982579035244 -1.24342057421619

h 1.74018880672464 2.38747113836754 -2.07948764470860

h 3.44447044233135 2.04793403721627 -2.01576502049917

h -2.52682596043359 3.10253534344182 -2.02936644073661

h -1.54295942598698 3.44950956995828 -0.63721629940078

h 2.65109001847071 2.70638222754176 -0.61455307492973

h -0.81211472462419 2.82246933677166 -2.10369568193806

h 3.73525016675037 -3.11216288973841 -0.96977267784077

h -4.59507281191803 -1.63127879600083 -0.92636741919902

h -3.67882403038883 -2.26327034497927 0.42201562611219

h 2.71334921398590 -3.37906912629266 0.42322706955396

h -3.86907635157303 0.81627655023659 -1.83044697012480

h 0.35944753933952 2.04015558407756 0.00019349476578

h -0.74516486997533 3.03512639016044 1.94790760197568

h 3.91720097840972 -0.55949320828155 -1.81812731744635

h 1.75127044348997 2.58196500364503 1.94897481261571

h 2.35608191875512 0.93787958738184 2.07403922473607

h -1.88903300603827 1.70814991353121 2.07150177741163

h 1.56098816204811 1.69098190598056 3.43499888578749

h -0.88187585633683 2.13371482048439 3.43378399983844

h 2.05818808921921 -3.56416909137660 -1.18852538131203

h -3.18230886481025 -2.62431459562975 -1.21566599907042

n -1.09239678475382 0.65608621074228 -0.22522698340654

n 1.24595747575287 0.24123822791650 -0.22624757590035

n -1.59185467487834 -0.57031703688895 0.01297719344768

n 1.28908720053452 -1.08329028767640 0.00601700224005

o -0.65374459005347 -3.62860638162763 -0.78240948957405

o -0.63585326782026 -3.64048387643410 1.41028373985292

s -0.09775459827371 -0.50276575140631 2.72826914927418

co -0.33206628509730 -1.84278756797906 0.98762305357596

1. Co transition state

C -0.561038 4.332569 -0.401962

C 2.758399 -0.535555 1.874487

C -2.066819 -1.917531 0.385932

C 2.122118 -1.474433 1.107154

C -3.646475 1.369862 0.677759

C 2.410742 2.008608 2.195393

C -2.797721 0.171861 0.487599

C 2.139096 0.683125 1.598681

C 0.200984 -1.334472 -0.513246

C -3.154223 -1.159551 0.719937

C 0.436221 -1.004430 -2.012146

C -0.660933 -1.681760 -2.820961

C 1.784311 -1.586367 -2.415214

C -1.901598 -3.385358 0.431875

C 2.365863 -2.929300 1.021837

H -0.488673 4.751260 -1.407063

H -0.539508 4.959964 1.478167

H 0.178865 6.001237 0.412144

H -4.091475 -1.521583 1.083214

H -0.668197 -2.757406 -2.672215

H -1.635085 -1.287372 -2.578251

H -0.488173 -1.496967 -3.870279

H 1.817896 -2.662675 -2.274232

H 2.594166 -1.132098 -1.865322

H 1.955031 -1.388173 -3.462446

H -2.816928 -3.829410 0.791126

H -1.695818 -3.811215 -0.541449

H -1.110646 -3.692455 1.104785

H 1.509084 -3.510923 1.338992

H 3.185421 -3.186274 1.674778

H 2.632334 -3.247472 0.023294

H 3.565197 -0.711916 2.552050

H -4.514939 1.310284 0.034344

H -3.109656 2.275141 0.449965

H -4.006481 1.413286 1.697575

H 3.347327 1.995577 2.732089

H 2.431012 2.775147 1.435577

H 1.630556 2.277611 2.897814

H 0.296165 -2.404339 -0.430765

H 1.419693 3.669627 -1.185751

N -1.123104 -1.040954 -0.033601

N 1.179633 -0.802879 0.405944

N -0.545534 5.326653 0.547395

N -1.555500 0.225232 0.035726

N 1.183814 0.502240 0.702449

O 0.990980 3.565111 -0.338521

O -1.321009 3.327223 -0.195872

S 0.445735 0.776815 -2.408219

Co -0.081108 1.774436 -0.470565

1. Co tetrahedral intermediate

C -0.270104 4.313689 -0.438368

N -0.266363 5.434812 0.453411

O -1.076991 3.295445 -0.126887

C -3.187165 -1.088900 0.684505

C 0.445388 -1.058308 -2.006714

C -0.649589 -1.725029 -2.826936

C 1.789337 -1.671676 -2.376652

C -2.014399 -3.356109 0.373083

C 2.214995 -3.010154 1.136376

C 2.727239 -0.612706 1.908702

C -2.127615 -1.883122 0.344773

C 2.053109 -1.541860 1.164506

C -3.544583 1.470878 0.712623

C 2.544738 1.957765 2.110994

C -2.771927 0.231286 0.487795

C 2.189113 0.629161 1.568766

C 0.180039 -1.367038 -0.507666

N -1.142939 -1.037999 -0.044778

N 1.165223 -0.847502 0.414482

N -1.525651 0.241894 0.047264

N 1.241602 0.466980 0.661040

O 1.059362 3.741293 -0.438125

S 0.504197 0.717932 -2.420625

Co -0.037956 1.719477 -0.490979

H -0.456286 4.711222 -1.442621

H -0.273279 5.071877 1.392065

H -1.132973 5.929263 0.337358

H -4.140655 -1.421234 1.033761

H -0.684167 -2.797890 -2.662590

H -1.619395 -1.305209 -2.610981

H -0.451019 -1.560683 -3.875150

H 1.796825 -2.747149 -2.225709

H 2.596918 -1.230417 -1.812881

H 1.987215 -1.485832 -3.421307

H -2.950502 -3.773782 0.709716

H -1.804152 -3.775961 -0.601758

H -1.246609 -3.698039 1.056080

H 1.318062 -3.530281 1.448612

H 3.001482 -3.289806 1.819872

H 2.488715 -3.377016 0.156332

H 3.508793 -0.809232 2.609958

H -4.435804 1.474490 0.097656

H -2.953042 2.340020 0.475300

H -3.867566 1.534358 1.744255

H 3.619210 2.070025 2.162002

H 2.145701 2.749674 1.498335

H 2.160465 2.076413 3.116963

H 0.250908 -2.437822 -0.412260

H 1.642097 4.262805 -0.983597

1. * Corresponding author: e-mail: ghermanb@csus.edu; phone: 916-278-6600; fax: 916-278-4986. [↑](#footnote-ref-2)
